1 **Chimpanzee SIV Envelope trimer: structure and deployment as an HIV**  
2 **vaccine template**

3

4 Raiees Andrabi,<sup>1,2,3,#</sup> Jesper Pallesen,<sup>2,3,4,#</sup> Joel Allen,<sup>2,3,5</sup> Ge Song,<sup>1,2,3</sup> Jinsong  
5 Zhang,<sup>6,7</sup> Natalia de Val,<sup>2,4</sup> Gavin Gegg,<sup>1,2,3</sup> Katelyn Porter,<sup>1,2,3</sup> Ching-Yao Su,<sup>1,2,3</sup>  
6 Matthias Pauthner,<sup>1,2,3</sup> Amanda Newman,<sup>6,7</sup> Hilary Bouton-Vervelle,<sup>6,7</sup> Fernando  
7 Garces,<sup>2,4</sup> Ian A. Wilson,<sup>2,3,4,8</sup> Max Crispin,<sup>2,3,5</sup> Beatrice H. Hahn,<sup>9</sup> Barton F.  
8 Haynes,<sup>6,10</sup> Laurent Verkoczy,<sup>6,7,11</sup> Andrew B. Ward,<sup>2,3,4,\*</sup> Dennis R.  
9 Burton<sup>1,2,3,12,13\*</sup>

10

11

12 <sup>1</sup>Department of Immunology and Microbiology, The Scripps Research Institute, La  
13 Jolla, CA 92037, USA

14 <sup>2</sup>International AIDS Vaccine Initiative, Neutralizing Antibody Center, The Scripps  
15 Research Institute, La Jolla, CA 92037, USA

16 <sup>3</sup>Center for HIV/AIDS Vaccine Immunology and Immunogen Discovery, The  
17 Scripps Research Institute, La Jolla, CA 92037, USA

18 <sup>4</sup>Department of Integrative Structural and Computational Biology, The Scripps  
19 Research Institute, La Jolla, CA 92037, USA

20 <sup>5</sup>Department of Biological Sciences, University of Southampton, UK

21 <sup>6</sup>Duke Human Vaccine Institute and Departments of Medicine and Immunology,  
22 Duke University School of Medicine, Durham NC 27710

23 <sup>7</sup>Department of Pathology, Duke University School of Medicine, Durham, NC  
24 27710

25 <sup>8</sup>Skaggs Institute for Chemical Biology, The Scripps Research Institute, La Jolla,  
26 CA 92037, USA

27 <sup>9</sup>Departments of Medicine and Microbiology, University of Pennsylvania,  
28 Philadelphia, PA, 19104, USA.

29 <sup>10</sup>Department of Immunology, Duke University School of Medicine, Durham, NC  
30 27710

31 <sup>11</sup>San Diego Biomedical Research Institute, San Diego CA, 92121

32 <sup>12</sup>Ragon Institute of Massachusetts General Hospital, Massachusetts Institute of  
33 Technology, and Harvard, Cambridge, MA 02114, USA

34 <sup>13</sup>Lead contact

35 #Co-first authors

36 \*Correspondence: burton@scripps.edu (D.R.B.), andrew@scripps.edu (A.B.W.)

37

38

39 **Summary**

40

41 Epitope-targeted HIV vaccine design seeks to focus antibody responses to broadly  
42 neutralizing antibody (bnAb) sites by sequential immunization. Chimpanzee SIV  
43 Envelope (Env) shares a single bnAb site, the V2-apex, with HIV, suggesting its  
44 possible utility in an HIV immunization strategy. Accordingly, we generated a  
45 chimpanzee SIV Env trimer, MT145K, which displays selective binding to HIV V2-  
46 apex bnAbs and precursor versions, but no binding to other HIV specificities. We  
47 determined the structure of the MT145K trimer by cryo-EM and showed its  
48 architecture was remarkably similar to HIV Env. Immunization of an HIV V2-apex  
49 bnAb precursor Ab-expressing knock-in mouse with chimpanzee MT145K trimer  
50 induced HIV V2-specific neutralizing responses. Subsequent boosting with an HIV  
51 trimer cocktail induced responses exhibiting some virus cross-neutralization.  
52 Overall, the chimpanzee MT145K trimer behaves as expected from design both in  
53 vitro and in vivo and is an attractive potential component of a sequential  
54 immunization regimen to induce V2-apex bnAbs.

55

## 56 **Introduction**

57

58 The ability to induce human immunodeficiency virus (HIV) envelope (Env) specific  
59 broadly neutralizing antibodies (bnAbs) will likely be a key feature of a prophylactic  
60 vaccine immunogen. Potent Env-specific bnAbs are produced in a small subset of  
61 HIV infected donors, yet attempts to elicit such responses through immunization  
62 have failed to date (Escolano et al., 2017; Haynes and Mascola, 2017; McCoy and  
63 Burton, 2017; Ward and Wilson, 2017). Previous studies have revealed that the  
64 HIV bnAb germline reverted precursors possess unique features that greatly  
65 reduce their overall frequencies in the B cell immune repertoire and, hence, their  
66 ability to be targeted by vaccines (Briney et al., 2012; Haynes et al., 2012; Kepler  
67 et al., 2014; Klein et al., 2013; Verkoczy et al., 2010; Xiao et al., 2009). Therefore,  
68 recent immunogen design approaches that seek to induce bnAb responses by  
69 vaccination are taking these rare precursor features into consideration to efficiently  
70 activate bnAb precursors and shepherd them along favorable bnAb developmental  
71 pathways (Andrabi et al., 2015; Escolano et al., 2016; Gorman et al., 2016; Jardine  
72 et al., 2013; McGuire et al., 2013; Saunders et al., 2017; Steichen et al., 2016a).  
73 This design approach has shown great promise for two of the HIV Env bnAb sites,  
74 namely the CD4 binding site (CD4bs) and the V3-N332 glycan site in animal  
75 models expressing the appropriate germline precursors (Andrabi et al., 2018;  
76 Briney et al., 2016; Dosenovic et al., 2015; Escolano et al., 2016; Jardine et al.,  
77 2015; McGuire et al., 2016; Sok et al., 2016a; Steichen et al., 2016b; Tian et al.,  
78 2016; Williams et al., 2017). Thus, immunogen designs and strategies that can  
79 select rare bnAb precursors and reduce off-target B cell responses are valuable  
80 for nAb immunofocusing efforts.

81

82 One of the Env sites that has shown great promise for vaccine targeting is the V2  
83 apex bnAb epitope (Andrabi et al., 2015; Gorman et al., 2016; Voss et al., 2017).  
84 This bnAb epitope sits at the 3-fold axis of the trimer and is primarily formed by a  
85 patch rich in positively charged lysine residues and protected by two glycans at  
86 HXB2 HIV-1 reference positions N160 and N156/N173 that are part of the Env

87 glycan shield (Andrabi et al., 2017; Bhiman et al., 2015; Bonsignori et al., 2011;  
88 Doria-Rose et al., 2014; Gorman et al., 2016; Julien et al., 2013b; Lee et al., 2017;  
89 McLellan et al., 2011; Pancera et al., 2013; Walker et al., 2011; Walker et al.,  
90 2009). The bnAb precursors targeting this site possess a long anionic heavy-chain  
91 complementarity-determining region 3 (CDRH3) that penetrates the glycan shield  
92 to reach the protein epitope surface underneath (Bonsignori et al., 2011; Doria-  
93 Rose et al., 2014; Landais et al., 2017; Lee et al., 2017; McLellan et al., 2011;  
94 Walker et al., 2011; Walker et al., 2009). BnAb prototypes within this class interact  
95 with the V2 apex bnAb protein-glycan core epitope through common germline-  
96 encoded motifs and are, thus, targetable by unique trimers that bind with their  
97 germline Ab versions, previously reported by us and others (Andrabi et al., 2015;  
98 Gorman et al., 2016). Hence, the germline-priming immunogens to this site could  
99 be based directly on native-like trimer configurations (Sanders et al., 2013;  
100 Sanders et al., 2015). Other features that favor this site for vaccine targeting are:  
101 a) V2 apex bnAbs are elicited frequently in humans that make bnAbs, b) they  
102 emerge early in infection, and c) they possess relatively low levels of somatic  
103 mutation compared to most other HIV Env bnAbs (Bonsignori et al., 2011; Doria-  
104 Rose et al., 2014; Georgiev et al., 2013; Kepler et al., 2014; Landais et al., 2016;  
105 Landais et al., 2017; Moore et al., 2011; Walker et al., 2009; Wibmer et al., 2013).

106

107 Of note, among the major HIV Env bnAb specificities that include V2-apex, V3-  
108 N332, CD4bs and gp120-41 interface, the V2 apex site is the only bnAb site that  
109 consistently exhibits cross-group neutralizing activity with virus Envs derived from  
110 HIV-1 group M, N, O and P (Braibant et al., 2013; Morgand et al., 2016). In addition,  
111 V2-apex bnAbs display cross-neutralizing activity with the Simian  
112 Immunodeficiency Virus (SIV) isolates that infect chimpanzees (SIVcpzPtt [*Pan*  
113 *troglodytes troglodytes*], SIVcpzPts [*Pan troglodytes schweinfurthii*]) and gorillas  
114 (SIVgor) (Barbian et al., 2015). The retention of the V2 apex bnAb epitope at the  
115 time of species cross-over from chimpanzees to humans highlights the biological  
116 significance of this region and here we sought to design a trimer based on the  
117 SIVcpzPtt Env sequence that could potentially guide an immunofocused response

118 to the HIV V2 apex bnAb epitope. We hypothesized that an SIVcpz*Ptt*-based trimer  
119 will not only help to specifically enrich V2 apex-specific B cells but also, owing to  
120 V2 apex species cross-conservation, could help guide a V2-focused nAb response  
121 when coupled with HIV trimers in a sequential prime/boost immunization strategy.  
122 In such an immunization scheme, overall Env backbone sequence diversity in  
123 combination with conservation of the V2 apex bnAb epitope in sequentially  
124 administered immunogens is likely to reduce germinal center competition for V2  
125 apex-specific B cells (Tas et al., 2016; Wang et al., 2015). Such a scheme could  
126 not only favor a B cell recall response to the V2 apex bnAb epitope but also reduce  
127 off-target Env-specific responses.

128

129 We designed here an SIVcpz*Ptt*-based trimer, MT145K, that displays native trimer-  
130 like properties, and selectively binds V2 apex bnAbs as well as their germline  
131 reverted precursor versions. We determined a structure of the MT145K trimer by  
132 cryo-EM at a global resolution of 4.1Å and the overall architecture was remarkably  
133 similar to HIV Env trimers (Julien et al., 2013a; Lyumkis et al., 2013; Ozorowski et  
134 al., 2017; Pancera et al., 2014). In addition, the glycan shield composition of  
135 MT145K closely resembled that of HIV Env glycans but was sufficiently different in  
136 positioning of the glycans to exclude binding of all HIV bnAbs except for those  
137 directed to the V2 apex. MT145K trimer immunization in a V2 apex unmutated  
138 common ancestor (UCA)-expressing knock-in mouse model revealed induction of  
139 a predominantly V2-apex-site neutralizing Ab response that was reproducible and  
140 cross-neutralized a related set of HIV isolates. Overall, the chimpanzee MT145K  
141 immunogen shows promise as an immunogen in HIV vaccination strategies.

142

## 143 **Results**

144

### 145 **Selection and design of a chimpanzee Env-derived trimer**

146 Immunogen templates based on native-like Env trimers offer great potential for HIV  
147 vaccine development, as they display bnAb epitopes and largely occlude non-  
148 native epitopes. However, it remains challenging to induce an epitope-focused

149 bnAb response with Env trimer immunogens, as the bnAb epitopes are relatively  
150 immunoquiescent and even very limited exposure of non-desirable epitopes can  
151 disturb responses to bnAb epitopes (Havenar-Daughton et al., 2017; Wang et al.,  
152 2015). Therefore, trimer designs and/or strategies that can mask non-relevant  
153 immunodominant epitopes or reduce induction of off-target Ab responses could  
154 help guide immunofocused neutralizing responses. In addition, typical lack of  
155 interaction of Env forms with germline-reverted bnAb precursors means difficulties  
156 in activating the appropriate B cell lineages. Accordingly, we undertook design of  
157 a trimer immunogen that could help guide an epitope-focused Ab response to the  
158 V2 apex site of HIV Env. Based on previous studies, we hypothesized that a  
159 chimpanzee SIVcpzPtt/Pts or gorilla SIVgor Env sequence-based trimer that  
160 shares the V2 apex bnAb epitope with HIV-1 could enrich B cell precursors and  
161 boost responses specific to this site (Barbian et al., 2015). Since SIVcpzPtt, among  
162 various SIV-species Env sequences, are phylogenetically closest to the HIV-1 Env,  
163 we surmised that the SOSIP.664 trimer-stabilizing modifications, which have been  
164 used on several HIV-1 Env backgrounds, could be employed for stabilization of  
165 soluble SIV Env (Gao et al., 1999; Sanders et al., 2013; Sharp and Hahn, 2011).

166  
167 We incorporated the SOSIP.664 trimer design modifications into four SIVcpzPtt  
168 Env sequences; GAB1, MB897, EK505, and MT145 (Figure S1A). These isolates  
169 have been previously shown to be sensitive to the V2 apex bnAbs, PG9, PG16,  
170 and PGT145 (Barbian et al., 2015). Further characterization showed that one of  
171 these SIVcpzPtt Env sequences, MT145 SOSIP.664, could be expressed as a  
172 soluble Env trimer protein (Figure S1B). PGT145 Ab affinity-purified MT145 trimer  
173 was efficiently cleaved into gp120 and gp41 subunits, and revealed well-ordered  
174 native-like trimer configurations that were highly thermostable, which are all  
175 properties displayed by natively folded HIV-1 soluble trimers (Figure S2A-D)  
176 (Pugach et al., 2015; Sanders et al., 2013; Sharma et al., 2015).

177

178 **MT145K trimer binds prototype V2 apex bnAb precursors**

179 One property thought to be critical for vaccine immunogens to select rare bnAb  
180 precursors is the ability to effectively bind to UCA B cell receptors (Dosenovic et  
181 al., 2015; Escolano et al., 2016; Jardine et al., 2015; McGuire et al., 2016; Steichen  
182 et al., 2016a). Therefore, to gain or improve binding of the V2 apex bnAb inferred  
183 precursor Abs to MT145 Env trimer, we substituted a glutamine (Q) with a lysine  
184 (K) residue (HXB2 position 171) in strand C of the V2 apex bnAb core epitope  
185 (Figure 1A-B). We based this substitution on the presence of a positively charged  
186 motif (KKKK) in CRF250 and CP256.SU strand C V2 Env sequences, both of  
187 which bind V2 apex bnAb prototype precursors (Andrabi et al., 2015; Doria-Rose  
188 et al., 2014; Gorman et al., 2016). ELISA binding revealed strong binding of the  
189 mature V2 apex bnAb prototypes with the MT145-WT trimer and weak but  
190 detectable binding with one of the UCA Abs, CAP256 UCA (Figure 1C). Strikingly,  
191 binding with our V2-engineered MT145 trimer (henceforth referred to as “MT145K”)  
192 not only improved binding to CAP256 UCA Ab but also conferred binding on both  
193 PG9 and CH01 iGL Abs (Figure 1C). The PG9 and CH01 iGL Abs used here had  
194 diversity (D; heavy chain) and joining (J; both heavy and light chains) genes  
195 reverted to their corresponding germline gene families in the CDRH3s, in addition  
196 to the VH and VL regions reported previously (Figure S3) (Andrabi et al., 2015;  
197 Gorman et al., 2016).

198

199 Previous mapping studies have defined the HIV core epitope recognized by mature  
200 V2 apex bnAbs (Andrabi et al., 2015; Gorman et al., 2016; Landais et al., 2017;  
201 Lee et al., 2017; McLellan et al., 2011; Pancera et al., 2013; Walker et al., 2009).  
202 To examine the contributions of V2 apex core epitope glycan and protein residues  
203 to binding by V2 apex bnAb inferred germline-reverted (iGL) Ab versions, we  
204 generated MT145K strand C peptide and glycan trimer variants that are known to  
205 eliminate interactions of V2 apex bnAbs with the Env trimer (Andrabi et al., 2015;  
206 McLellan et al., 2011; Pancera et al., 2013). Bio-Layer Interferometry (BLI or octet)  
207 binding analyses of the iGL Abs with these trimer variants showed that  
208 glycan/peptide epitope requirements of precursor Abs were largely similar to the  
209 requirements of corresponding mature Abs (Figure 1D), suggesting that most



210 contacts with the MT145K V2 apex core epitope are already encoded in the  
211 germline configuration for this class of bnAbs. Notably, the mature Abs showed  
212 slightly more tolerance to changes within the core protein epitope, particularly for  
213 the CAP256.09 bnAb, suggesting that part of the affinity maturation in this class of  
214 Abs may be to accommodate variation within the bnAb V2 apex core epitope.  
215 Overall, the strand C V2-modification in the MT145 SOSIP.664 trimer conferred  
216 binding to multiple V2 apex bnAb germline prototypes.

217

### 218 **Architecture of the MT145K trimer**

219 We solved the structure of the MT145K trimer by cryo-EM to a global resolution of  
220 ~4.1 Å (Figure S4, Table S1). Our structure represents the first atomic level  
221 structure of an SIV Env trimer. Like other class I fusion proteins, protomers (gp120  
222 and gp41) of MT145K trimerize to form a metastable pre-fusion Env trimer (Figures  
223 2A-B, S5). The trimer architecture exhibits a mushroom-like shape with subunits  
224 gp120 and gp41 constituting the envelope-distal and proximal entities, respectively  
225 (Figure 2B). Overall, the MT145K trimer configuration closely resembles that of the  
226 trimeric HIV-1 Env spike, with an overall C $\alpha$  root mean square deviation (rmsd) of  
227 1.9 Å (Kwon et al., 2015). Arrangement of V-loops in the MT145K Env trimer is  
228 reminiscent of the V-loop arrangement in the HIV Env trimer and is suggestive of  
229 a similar role in immune evasion by steric occlusion of underlying conserved  
230 epitopes (Julien et al., 2013a; Pancera et al., 2014). Notably, the V1 and V2 loops  
231 are largely solvent-exposed and occlude access to the underlying V3 loop (Figure  
232 2C). Inaccessibility of the V3 loop is mediated by intra-protomer interactions of  
233 V1V2 to V3 and by extensive inter-protomer V1V2 trimer interactions at the apex  
234 of the spike. The SIV Env trimer exhibits well-ordered V2-V5 loops, while V1 is  
235 somewhat disordered (Figure 2D).

236

237 Proximal to the viral membrane is the gp41 subunit that forms the base of the trimer  
238 spike and is arranged into heptad repeat-1 (HR1), HR2 and the fusion peptide (FP)  
239 (Figure 2B). Similar to the HIV Env trimer, the three C-terminal helices of HR1 are  
240 centrally positioned along the trimer axis perpendicular to the viral membrane

241 (Julien et al., 2013a; Lyumkis et al., 2013; Pancera et al., 2014). Intriguingly, the  
242 FP region, which has been observed solvent-exposed on the outside of the HIV-1  
243 Env, is positioned in a pocket inside the MT145K trimer and remains sequestered  
244 in all three protomers (Figure 2E).

245

### 246 **Conservation of the glycan shield on HIV and SIV Env trimers**

247 To compare the nature of the glycan shield on SIVcpzPtt Env and HIV Env, we  
248 performed site-specific glycan analysis of the MT145K trimer. The overall  
249 oligomannose content of the MT145K trimer is similar to HIV Env (Figure 3A-B)  
250 (Panico et al., 2016; Pritchard et al., 2015). However, although the distributions  
251 differed from the HIV-1 clade A strain BG505, which is dominated by Man<sub>9</sub>GlcNAc<sub>2</sub>  
252 oligomannose-type glycans, MT145K is predominantly Man<sub>8</sub>GlcNAc<sub>2</sub> (Behrens et  
253 al., 2016). In addition, further processing was evident in the MT145K trimer which  
254 showed elevated Man<sub>6-7</sub>GlcNAc<sub>2</sub> structures (Figure 3B, S6). The outer domain of  
255 gp120 presents a high density of oligomannose glycans that form the intrinsic  
256 mannose patch (Bonomelli et al., 2011), which was a highly conserved feature  
257 across the two viral species. The apex of the MT145K trimer possessed  
258 oligomannose-type glycans at N160 that correspond to the trimer associated  
259 mannose patch (TAMP) also observed on HIV-1 Env (Behrens et al., 2017). As for  
260 HIV-1, glycans at the base of the trimer at N88 and on gp41 of the MT145K trimer  
261 were extensively processed (Figures 3A, C, S6).

262

263 In the MT145K trimer, glycans at N156 and N262 were predominantly complex-  
264 type, whereas the corresponding glycans are oligomannose-type in HIV Env  
265 (Behrens et al., 2016). These differences may arise due to the proximity of  
266 neighbouring glycans. For instance, the HIV Env glycans at positions N295 and  
267 N332, adjacent to the N262 glycan, are absent on MT145K Env, which may lead  
268 to increased processing of N262 (Figure 3A, C). The remarkable conservation in  
269 the overall architecture of the SIV and HIV Env glycan shield, despite sharing only  
270 ~62% of the amino-acid sequence identity, suggests that the glycan shield has an  
271 indispensable role in immune evasion and potentially maintaining functional

272 integrity of the trimer spike. Indeed, the glycan shield is integral to all lentiviral  
273 envelopes and appears to have evolved somewhat specifically to mammalian host  
274 (Figure S7). Over the course of lentiviral evolution, the Env glycan density shows  
275 an overall gradual progression, and likely peaked in retroviruses infecting non-  
276 human primates and plateaued in HIV Envs (Figure S7) (Zhang et al., 2004).  
277 Therefore, the high-density Env glycan shield on HIV must have been established  
278 well before chimpanzee SIV crossed into humans. Nevertheless, several glycan  
279 positions on HIV-1 Env appear to have subtly shifted after the species cross-over  
280 that presumably resulted as an adaptation to the human immune system (Figure  
281 S8).

282

### 283 **MT145K binds V2 apex bnAbs almost exclusively**

284 To define the overall antigenicity of the MT145K trimer, we first assessed  
285 neutralization sensitivity of MT145K virus (MT145-Q171K) to a broad panel of HIV-  
286 1 Env-specific neutralizing and non-neutralizing (nnAbs) mAbs and compared  
287 these profiles to the clade A BG505 HIV virus (Figure 4A, S9) (Sanders et al., 2013;  
288 Voss et al., 2017). Remarkably, the V2 apex bnAbs, but essentially no other bnAbs  
289 or nnAbs (except 35O22 gp120-41 interface mAb), exhibited potent neutralizing  
290 activities against MT145K virus (Figure 4A, S9). As previously observed, the  
291 BG505 isolate was sensitive to neutralization by all of the bnAbs in the panel, but  
292 none of the nnAbs (Figure 4A Figure S9).

293

294 Next, we evaluated binding of MT145K trimer and monomeric gp120 to a panel of  
295 mAbs by ELISA. Consistent with the neutralization results above, bnAbs to the V2  
296 apex site showed robust binding to the MT145K trimer (Figures 4B, S9), but other  
297 bnAbs and nnAbs did not bind, except for a few mAbs that displayed very weak  
298 binding (Figures 4B, S9). PG9, 17b and some of the linear V3-loop directed mAbs  
299 (2557, 3074, 3904 and 14e) (Figures 4B, S9) that bound to the MT145K gp120  
300 monomer. The results suggest that the sequence-dependent epitopes for some of  
301 the non-neutralizing V3-loop mAbs are present on monomeric MT145K gp120, but  
302 are obscured on the MT145K trimer, as indicated by the MT145K structure. Virus

303 neutralization and trimer binding by mAbs is strongly correlated ( $p = 0.003$ ),  
304 consistent with the notion that the MT145K soluble trimer adopts a native-like  
305 trimeric Env configuration and displays antigenic properties optimal for a vaccine  
306 immunogen.

307

### 308 **HIV bnAb epitopes on SIV Env**

309 To gain insight into the differences in the HIV-1 Env bnAb epitopes on MT145K  
310 SIV Env that may potentially explain the reactivity of V2 apex bnAbs and non-  
311 reactivity of HIV bnAbs targeting other Env epitopes, we took advantage of the  
312 previously determined structures of human HIV bnAbs in complex with various HIV  
313 Env forms and compared the corresponding epitope regions with the MT145K Env  
314 (Garces et al., 2014; Lee et al., 2017; Lee et al., 2016; Ozorowski et al., 2017;  
315 Pejchal et al., 2011; Wu et al., 2010). A lysine-rich patch in strand C of the V2 loop  
316 (<sup>166</sup>RDKKQK<sup>171</sup> on BG505 Env) and two nearby glycans N160 and N156 form the  
317 core epitope for V2 apex bnAbs on HIV Envs (Figure 5A, S10) (Gorman et al.,  
318 2016; Julien et al., 2013b; Lee et al., 2017; McLellan et al., 2011; Pancera et al.,  
319 2013). Both of these features are conserved on the MT145K trimer, thus enabling  
320 the human V2 apex bnAbs to be highly effective against the SIV Envs (Figures 5A,  
321 S8, S10) (Barbian et al., 2015).

322

323 Binding of one of the N332-V3 epitope specific bnAbs, PGT128, predominantly  
324 relies on the N332 glycan and a neighboring peptide motif <sup>324</sup>GDIR<sup>327</sup> at the base  
325 of the V3 loop (Figures 5B, S10) (Garces et al., 2014; Pejchal et al., 2011; Sok et  
326 al., 2016b). The lack of binding to the MT145K trimer by PGT128 and other bnAbs  
327 in this class can be explained by the absence of the N332 glycan on this Env. In  
328 contrast, 3 of the 4 core protein epitope residues <sup>324</sup>G-<sup>325</sup>D-<sup>327</sup>R are conserved on  
329 MT145K trimer and, in fact, on other chimpanzee SIV Envs (Figures 5B, S8, S10).  
330 For the PGT128 class bnAbs, the interaction with glycan N332 can be substituted  
331 by the N295 glycan observed in some HIV isolates, but not by glycan N334 that is  
332 present on the MT145K trimer (Sok et al., 2014a). In fact, the MT145K N334 glycan  
333 points in a different direction away from the N332-V3 epitope site making it

334 impossible to facilitate bnAb binding to this epitope. Strikingly, the majority of  
335 known SIVcpz Env sequences possess an N334 glycan in place of the more  
336 common N332 glycan on the HIV Env, which appears to be a significant glycan  
337 shift upon species cross-over as the virus established itself in humans (Figure S8).  
338 In addition, the glycan at N412 in the gp120-V4 region of MT145K Env may  
339 obstructively interfere with bnAb binding, and, particularly, the glycan at N442,  
340 unique to the MT145K Env trimer and several other SIVcpz Envs, would clash with  
341 CDRH2 of PGT128 and other bnAbs in this class and may prevent them from  
342 accessing the epitope (Figure 5B, S8).

343

344 PGT151 represents another glycan-targeting bnAb class (Blattner et al., 2014;  
345 Falkowska et al., 2014; Lee et al., 2016) that recognizes several glycans on gp120  
346 (N88, N448) and gp41 (N611 and N637) as well as the fusion peptide. All glycans  
347 and fusion peptide residues that contribute to the PGT151 epitope are conserved  
348 between HIV and SIVcpz Envs (Figure S8). Therefore, the lack of PGT151 binding  
349 to MT145K is most likely attributable to inaccessibility of the FP on MT145K (Figure  
350 5C).

351

352 The CD4bs is conserved between HIV and SIV to the extent that there is cross-  
353 species reactivity with sCD4. Human CD4-IgG2 immunoadhesin binds well to the  
354 MT145K trimer, indicating a strong cross-species conservation of the Env CD4bs.  
355 Phe43 in domain-1 of human sCD4 would fit well inside the Trp427 Env cavity on  
356 the MT145K trimer reminiscent of its interaction with the HIV Env BG505 trimer  
357 (Figure 5D) (Ozorowski et al., 2017). However, the MT145K trimer is nonreactive  
358 with CD4bs bnAbs. VRC01, one of the bnAbs in this class, binds to the HIV Env  
359 CD4bs bnAb epitope formed by discontinuous protein backbone elements  
360 including loop D of the gp120-C2 region and bordered by a glycan at N276 (Figure  
361 5E-F, S10) (Wu et al., 2010). MT145K lacks the N276 glycan and the proximal  
362 N234 glycan, present in most HIV-1 Envs, but instead has a glycan at position 236.  
363 Differences in the loop D sequence (Figure S8) and the glycan at N236, which  
364 would clash with VRC01 CDRL1 and CDRL3 loops (Figure 5F) on the MT145K

365 trimer likely impose the biggest impediment to VRC01 binding. Further, the  
366 MT145K gp120-V5 loop has a 6-amino acid insertion at HXB2 position 456  
367 compared to HIV-1 Envs that would clash with the VRC01 LC (Figure 5F, S8).

368

369 Overall, the non-reactivity of HIV Env bnAbs with the MT145K trimer can be largely  
370 ascribed to subtle glycan shifts that have occurred in HIV-1 from chimpanzee SIV  
371 Env as the virus established itself in humans.

372

373 **The engineered MT145K but not the MT145-WT trimer activates V2 apex UCA-**  
374 **expressing B cell precursors *in vivo***

375 To determine whether the engineered chimpanzee MT145K trimer could efficiently  
376 activate HIV V2 apex Ab germline-encoding precursor B cells *in vivo* and how it  
377 compares with the MT145-WT trimer, we conducted immunization experiments in  
378 the CH01 unmutated common ancestor (UCA) “HC only” knock-in (KI) mouse  
379 model. This KI-mouse model expresses the pre-rearranged heavy chain (V<sub>H</sub>DDJ<sub>H</sub>)  
380 of the CH01 V2 apex bnAb UCA paired with WT mouse light chains. We immunized  
381 two groups of 5 CH01 UCA “HC only” KI mice, each with two repeated doses (at  
382 week-0 and week -4) of MT145-WT or MT145K trimer (Figure 6A). To track the  
383 development of Ab responses, we performed ELISA assays of the pre-bleed, 2-  
384 week (day 14) post prime (Bleed #1) and 2-week post boost-1 (day 42) (Bleed #2)  
385 serum samples with MT145K SOSIP trimer protein and its N160 glycan knock-out  
386 variant (MT145K N160K) (Figure 6B). The pre-bleed serum samples in both  
387 immunization groups exhibited weak binding activity with the MT145K trimer that  
388 was dependent on the N160 glycan, consistent with the presence of CH01 UCA  
389 Abs that do show some binding to MT145K trimer as described above (Figure 6B).

390

391 The immunogen-specific titers of the serum Ab responses post prime  
392 immunizations (Bleed #1 samples) marginally increased in the MT145K group but  
393 remained largely unchanged in the MT145-WT trimer immunized group. The  
394 serum Ab titers post boost-1 immunization (Bleed #2) increased in both the groups  
395 and were orders of magnitude higher as compared to the pre-bleed or the post

396 prime Ab binding responses (Figure 6B). At this immunization step, the serum Ab  
397 responses in the MT145K trimer immunized group were solely dependent on the  
398 N160 glycan while the MT145-WT trimer immunization group responses targeted  
399 the MT145 Env that were mostly independent of the N160 glycan, which forms part  
400 of the core V2 apex bnAb epitope (Figure 6B). Therefore, we conclude that the  
401 engineered MT145K trimer but not the MT145-WT, efficiently triggers the epitope  
402 specific V2-apex bnAb UCA encoding B cell precursors *in vivo*. Remarkably,  
403 immunizations with Q171K substituted engineered MT145K trimer also appeared  
404 to eliminate the non-V2 apex bnAb site Env specific off-target B cell responses that  
405 were elicited in the MT145-WT trimer immunization group (Figure 6B). The results  
406 demonstrate that the activation of the HIV Env bnAb-encoding unmutated B cell  
407 precursor by immunogens that display binding to their UCA Ab versions is critical  
408 for eliciting epitope-specific Ab responses and the findings are consistent with  
409 studies that specifically use germline-targeting immunogen molecules to kick-off  
410 the bnAb precursor encoding B cell responses *in vivo* (Dosenovic et al., 2015;  
411 Escolano et al., 2016; Jardine et al., 2015; McGuire et al., 2013; Sok et al., 2016a;  
412 Steichen et al., 2016b; Tian et al., 2016).

413  
414 Next, we evaluated immune sera for neutralization of autologous and heterologous  
415 viruses. Reproducible MT145K autologous virus-specific neutralizing Ab  
416 responses were induced in the MT145K immunization group but not in the MT145-  
417 WT immunization group (Figure 6C-D). As for the ELISA binding responses, the  
418 nAb titers in the MT145K trimer immunized group increased at 2 weeks post prime,  
419 as indicated by nAb titers against a highly CH01 sensitive HIV Env-encoding virus  
420 (Q23\_17), and further significantly increased after the boost-1 immunization  
421 (Figure 6C). At this point, all animals in the MT145K group developed autologous  
422 virus specific nAb responses (Figure 6C). The nAb responses in MT145K trimer-  
423 immunized animals mapped to the glycan N160 and strand C K171 residue, both  
424 of which form part of the core epitope for V2-apex bnAbs, suggesting that the  
425 MT145K trimer successfully primed V2 apex UCA B cells in an epitope-specific  
426 manner *in vivo*.

427

428 Overall, we conclude that the engineered MT145K but not the MT145-WT trimer  
429 activated the V2-apex specific bnAb precursor B cells in a UCA-expressing mouse  
430 model and further drove maturation along favorable B cell pathways.

431

432 **Combining chimpanzee SIV MT145K trimer with HIV Env trimer**  
433 **immunizations in the CH01 UCA model**

434

435 Evaluation of the utility of the MT145K trimer in a sequential HIV immunization  
436 regime will be best carried out in humans. Nevertheless, we were interested to  
437 investigate the effects of combining the chimpanzee SIV MT145K and HIV Env  
438 trimers in a prime-boost immunization in the CH01 UCA “HC only” KI mice. We  
439 immunized 4 groups of CH01 UCA KI mice with combinations of chimpanzee SIV  
440 MT145K SOSIP and HIV CRF250 SOSIP, previously shown to bind CH01 iGL Ab  
441 (Andrabi et al., 2015; Gorman et al., 2016), and finally boosted with an HIV Env  
442 derived 3-trimer cocktail (C108, WITO and ZM197-ZM233V1V2 SOSIPs) (Figure  
443 7A). After priming, MT145K trimer-primed animals showed autologous ID50 nAb  
444 response in only 1 out of 10 animals while CRF250 priming produced autologous  
445 nAb titers in 6 out of the 10 animals (Figure 7B, Table S2). This is the result of the  
446 increased sensitivity of the CRF250 virus compared to the MT145K virus to  
447 neutralization by CH01 bnAb since both sets of primed animals neutralized the  
448 CH01 bnAb-sensitive Q23\_17 virus (Figure 7B). The priming also led to  
449 development of sporadic cross-neutralizing responses against a few HIV  
450 heterologous viruses sensitive to CH01-class bnAbs (Bonsignori et al., 2011),  
451 including against the CRF250 virus in MT145K trimer primed animal groups  
452 (Figure 7B, Table S2).

453

454 Homologous (MT145K and CRF250 primed animals boosted with MT145K and  
455 CRF250, respectively) and heterologous (MT145K and CRF250 primed animals  
456 boosted with CRF250 and MT145K, respectively) boosting immunizations  
457 produced stronger nAb responses in all the animals suggesting an immune recall  
458 response. There was a general improvement in the neutralization breadth against



459 heterologous viruses (Table S2), suggesting that the boosting immunizations  
460 resulted in development of B cell responses along favorable maturation pathways.  
461 The responses mapped entirely to N160 glycan and the strand C residues that  
462 form part of V2 apex bnAb core epitope (Andrabi et al., 2015) (Table S2). Of note,  
463 there was no significant difference between homologous and heterologous  
464 boosting in this model.

465

466 Following further boosting with an HIV trimer cocktail, a number of animals in all  
467 the groups developed some neutralization breadth (Fig 7C). There was a trend for  
468 greater breadth in the animals in which SIV and HIV trimer immunizations were  
469 combined but this only achieved significance ( $p=0.045$ ) when comparing the  
470 CRF250-MT145K Env and the CRF250-CRF250 Env prime/boost regimes. We  
471 were confounded that greater differences between SIV/HIV and HIV/HIV  
472 immunizations were not observed as might be anticipated by an expected  
473 reduction in off-target responses in the former case. However, the frequency of B  
474 cell precursors in the mice is very high and this factor may have allowed the  
475 HIV/HIV regime to be more effective than it would be when precursor frequencies  
476 are much lower by enhancing the likelihood of on-target relative to off-target  
477 responses.

478

479 Overall, the analysis of the immune responses revealed that, due to the  
480 extraordinary conservation of the V2 apex bnAb epitope region between HIV and  
481 chimpanzee SIV, the MT145K trimer successfully primed human V2 apex bnAb  
482 UCA-encoding mouse B cells and induced a V2-focused cross-neutralizing HIV  
483 Env specific response that could be further boosted by HIV Env derived trimers

484

## 485 **Discussion**

486

487 Vaccination has taken advantage of related viruses from a different species,  
488 beginning with the use of cowpox as a smallpox vaccine (Riedel, 2005). HIV is too  
489 variable and has too many evasion mechanisms for such an approach applied

490 directly to work effectively. Nevertheless, there are HIV related viruses that have  
491 the potential to be exploited in some form in vaccine design. Indeed, the HIV  
492 pandemic is believed to have arisen because of a cross-species virus transmission  
493 from chimpanzees to humans in the period from 1910-1930 (Korber et al., 2000;  
494 Sharp and Hahn, 2011; Worobey et al., 2008). The HIV and chimpanzee SIV Envs,  
495 the target of potentially protective neutralizing antibodies, display about 60%  
496 sequence conservation at the amino acid level. Importantly, HIV V2-apex bnAbs  
497 have been shown to neutralize certain chimpanzee SIV isolates, including the  
498 SIVcpzPtt isolate MT145, suggesting cross-species conservation of this epitope.  
499 Accordingly, we generated a chimpanzee SIV Env trimer (MT145 SOSIP) and  
500 showed that it bound HIV V2-apex bnAbs. We then engineered it to bind to  
501 germline-reverted V2 apex bnAbs (MT145K SOSIP) so that it might be useful in  
502 activating V2-apex precursors.

503

504 The cryoEM structure of MT145K SOSIP trimer revealed that the Env trimers of  
505 HIV and chimpanzee SIV have very similar overall architectures. The glycan shield  
506 of chimpanzee SIV forms a similarly dense protective layer to antibody recognition  
507 of the protein surface as observed in HIV. However, subtle movements in the  
508 locations of the glycans contribute to the inability of the great majority of HIV-1  
509 bnAbs to recognize the chimpanzee SIV Env trimer. As noted above, bnAbs to the  
510 V2 apex region of the trimer are the exception. We have hypothesized previously  
511 (Lee et al., 2017) that the conservation of this region amongst HIV isolates is to  
512 facilitate trimer disassembly during viral entry. It is interesting that the overall V2  
513 apex structure is conserved across the chimpanzee-human species barrier  
514 indicating its critical importance for Env function.

515

516 In order to evaluate, MT145K trimer as an immunogen able to activate V2-apex  
517 bnAb precursor B cells, we took advantage of the availability of V2-apex bnAb UCA  
518 H chain only knock-in mice. We compared MT145K and MT145 trimers as  
519 immunogens. Following two immunizations, MT145K trimers reproducibly elicited  
520 Abs able to neutralize the autologous virus and a few V2-apex Ab sensitive viruses

521 whereas MT145 trimers failed to induce such nAbs. The specificities of the nAbs  
522 were dependent on the glycan at N160 and a lysine on strand C of the V2. Boosting  
523 with a cocktail of HIV Env trimers successfully recalled the V2 apex specific nAb  
524 responses and generated some enhanced heterologous neutralization. Therefore,  
525 from studies in this mouse model, the MT145K trimer appears a promising  
526 immunogen.

527

528 In conclusion, chimpanzee SIV Env trimers closely resemble HIV Env trimers with  
529 key differences that likely reflect the different immune pressures exerted by the  
530 human compared to the chimpanzee antibody repertoire. Nevertheless, the  
531 retention of the V2-apex bnAb region and its behavior in a mouse model suggests  
532 that the chimpanzee SIV Env can find application in sequential HIV vaccination  
533 strategies.

534

535

536

537 **STAR+METHODS**

538

539 Detailed methods are provided in the online version of this paper and include the  
540 following:

541

542     ▪ **METHOD DETAILS**

543

544     ○ SIV envelope trimer design, its expression and purification

545     ○ Antibodies, expression and purification

546     ○ Site-directed mutagenesis

547     ○ Differential Scanning Calorimetry

548     ○ Negative stain electron microscopy and data treatment

549     ○ CryoEM sample preparation, data collection, processing and analysis

550     ○ Model building and refinement

551     ○ Global N-linked glycan analysis

552     ○ LC-MS glycopeptide analysis

553     ○ Glycan modeling

554     ○ Pseudovirus production

555     ○ Neutralization assay

556     ○ ELISA binding assay

557     ○ Bio Layer Interferometry (BLI) binding assay

558     ○ Trimer protein immunizations in CH01 UCA HC-only KI-mice

559     ○ Data availability

560

561

562 **AUTHOR CONTRIBUTIONS**

563 R.A., J.P., J.A., J.Z., L.V., A.B.W., and D.R.B. designed the experiments. R.A.,

564 J.P., J.A., G.S., J.Z., N.D.V., G.G., K.P., C.Y.S., M.P., A.N., and F.G. performed

565 the experiments. H.B.V., I.A.W., M.C., B.H.H., and B.F.H. contributed critical

566 reagents. R.A. J.P., J.A., A.B.W., and D.R.B. analyzed the data and wrote the

567 paper, with inputs from other authors. R.A. and D.R.B. conceived the idea of using  
568 SIVcpzPtt Env-derived trimer as an HIV vaccine template.

569

## 570 **ACKNOWLEDGMENTS**

571 This work was supported by the International AIDS Vaccine Initiative (IAVI) through  
572 Neutralizing Antibody Consortium SFP1849 (D.R.B., A.B.W., I.A.W.); the National  
573 Institute of Allergy and Infectious Diseases (Center for HIV/AIDS Vaccine  
574 Immunology and Immunogen Discovery Grant UM1AI100663) (to D.R.B., A.B.W.,  
575 I.A.W.), the Ragon Institute of MGH, MIT, and Harvard (D.R.B.). This study was  
576 made possible by the generous support of the Bill and Melinda Gates Foundation  
577 Collaboration for AIDS Vaccine Discovery (CAVD, OPP115782 and OPP1084519)  
578 and the American people through USAID. We thank Christina Corbaci and for her  
579 help in the preparation of figures.

## 580 References

581

- 582 Adams, P.D., Grosse-Kunstleve, R.W., Hung, L.W., Ioerger, T.R., McCoy, A.J., Moriarty,  
583 N.W., Read, R.J., Sacchettini, J.C., Sauter, N.K., and Terwilliger, T.C. (2002). PHENIX:  
584 building new software for automated crystallographic structure determination. *Acta*  
585 *Crystallogr D Biol Crystallogr* 58, 1948-1954.
- 586 Agirre, J., Iglesias-Fernandez, J., Rovira, C., Davies, G.J., Wilson, K.S., and Cowtan, K.D.  
587 (2015). Privateer: software for the conformational validation of carbohydrate  
588 structures. *Nature structural & molecular biology* 22, 833-834.
- 589 Andrabi, R., Bhiman, J.N., and Burton, D.R. (2018). Strategies for a multi-stage  
590 neutralizing antibody-based HIV vaccine. *Curr Opin Immunol* 53, 143-151.
- 591 Andrabi, R., Su, C.Y., Liang, C.H., Shivatare, S.S., Briney, B., Voss, J.E., Nawazi, S.K., Wu,  
592 C.Y., Wong, C.H., and Burton, D.R. (2017). Glycans Function as Anchors for Antibodies  
593 and Help Drive HIV Broadly Neutralizing Antibody Development. *Immunity* 47, 524-  
594 537 e523.
- 595 Andrabi, R., Voss, J.E., Liang, C.H., Briney, B., McCoy, L.E., Wu, C.Y., Wong, C.H.,  
596 Poignard, P., and Burton, D.R. (2015). Identification of Common Features in Prototype  
597 Broadly Neutralizing Antibodies to HIV Envelope V2 Apex to Facilitate Vaccine  
598 Design. *Immunity* 43, 959-973.
- 599 Barad, B.A., Echols, N., Wang, R.Y., Cheng, Y., DiMaio, F., Adams, P.D., and Fraser, J.S.  
600 (2015). EMRinger: side chain-directed model and map validation for 3D cryo-electron  
601 microscopy. *Nature methods* 12, 943-946.
- 602 Barbian, H.J., Decker, J.M., Bibollet-Ruche, F., Galimidi, R.P., West, A.P., Jr., Learn, G.H.,  
603 Parrish, N.F., Iyer, S.S., Li, Y., Pace, C.S., *et al.* (2015). Neutralization properties of  
604 simian immunodeficiency viruses infecting chimpanzees and gorillas. *mBio* 6.
- 605 Behrens, A.J., Harvey, D.J., Milne, E., Cupo, A., Kumar, A., Zitzmann, N., Struwe, W.B.,  
606 Moore, J.P., and Crispin, M. (2017). Molecular Architecture of the Cleavage-Dependent  
607 Mannose Patch on a Soluble HIV-1 Envelope Glycoprotein Trimer. *Journal of virology*  
608 91.
- 609 Behrens, A.J., Vasiljevic, S., Pritchard, L.K., Harvey, D.J., Andev, R.S., Krumm, S.A.,  
610 Struwe, W.B., Cupo, A., Kumar, A., Zitzmann, N., *et al.* (2016). Composition and  
611 Antigenic Effects of Individual Glycan Sites of a Trimeric HIV-1 Envelope  
612 Glycoprotein. *Cell reports* 14, 2695-2706.
- 613 Bhiman, J.N., Anthony, C., Doria-Rose, N.A., Karimanzira, O., Schramm, C.A., Khoza, T.,  
614 Kitchin, D., Botha, G., Gorman, J., Garrett, N.J., *et al.* (2015). Viral variants that initiate  
615 and drive maturation of V1V2-directed HIV-1 broadly neutralizing antibodies. *Nature*  
616 *medicine* 21, 1332-1336.
- 617 Blattner, C., Lee, J.H., Sliепен, K., Derking, R., Falkowska, E., de la Pena, A.T., Cupo, A.,  
618 Julien, J.P., van Gils, M., Lee, P.S., *et al.* (2014). Structural delineation of a quaternary,  
619 cleavage-dependent epitope at the gp41-gp120 interface on intact HIV-1 Env trimers.  
620 *Immunity* 40, 669-680.
- 621 Bonomelli, C., Doores, K.J., Dunlop, D.C., Thaney, V., Dwek, R.A., Burton, D.R., Crispin,  
622 M., and Scanlan, C.N. (2011). The glycan shield of HIV is predominantly oligomannose  
623 independently of production system or viral clade. *PloS one* 6, e23521.

624 Bonsignori, M., Hwang, K.K., Chen, X., Tsao, C.Y., Morris, L., Gray, E., Marshall, D.J.,  
625 Crump, J.A., Kapiga, S.H., Sam, N.E., *et al.* (2011). Analysis of a clonal lineage of HIV-1  
626 envelope V2/V3 conformational epitope-specific broadly neutralizing antibodies and  
627 their inferred unmutated common ancestors. *Journal of virology* *85*, 9998-10009.  
628 Braibant, M., Gong, E.Y., Plantier, J.C., Moreau, T., Alessandri, E., Simon, F., and Barin,  
629 F. (2013). Cross-group neutralization of HIV-1 and evidence for conservation of the  
630 PG9/PG16 epitopes within divergent groups. *Aids* *27*, 1239-1244.  
631 Briney, B., Sok, D., Jardine, J.G., Kulp, D.W., Skog, P., Menis, S., Jacak, R., Kalyuzhnyi, O.,  
632 de Val, N., Sesterhenn, F., *et al.* (2016). Tailored Immunogens Direct Affinity  
633 Maturation toward HIV Neutralizing Antibodies. *Cell* *166*, 1459-1470 e1411.  
634 Briney, B.S., Willis, J.R., and Crowe, J.E., Jr. (2012). Human peripheral blood antibodies  
635 with long HCDR3s are established primarily at original recombination using a limited  
636 subset of germline genes. *PloS one* *7*, e36750.  
637 Brochet, X., Lefranc, M.P., and Giudicelli, V. (2008). IMGT/V-QUEST: the highly  
638 customized and integrated system for IG and TR standardized V-J and V-D-J sequence  
639 analysis. *Nucleic acids research* *36*, W503-508.  
640 Chen, V.B., Arendall, W.B., 3rd, Headd, J.J., Keedy, D.A., Immormino, R.M., Kapral, G.J.,  
641 Murray, L.W., Richardson, J.S., and Richardson, D.C. (2010). MolProbity: all-atom  
642 structure validation for macromolecular crystallography. *Acta Crystallogr D Biol*  
643 *Crystallogr* *66*, 12-21.  
644 DiMaio, F., Song, Y., Li, X., Brunner, M.J., Xu, C., Conticello, V., Egelman, E., Marlovits, T.,  
645 Cheng, Y., and Baker, D. (2015). Atomic-accuracy models from 4.5-Å cryo-electron  
646 microscopy data with density-guided iterative local refinement. *Nature methods* *12*,  
647 361-365.  
648 Doria-Rose, N.A., Schramm, C.A., Gorman, J., Moore, P.L., Bhiman, J.N., DeKosky, B.J.,  
649 Ernandes, M.J., Georgiev, I.S., Kim, H.J., Pancera, M., *et al.* (2014). Developmental  
650 pathway for potent V1V2-directed HIV-neutralizing antibodies. *Nature* *509*, 55-62.  
651 Dosenovic, P., von Boehmer, L., Escolano, A., Jardine, J., Freund, N.T., Gitlin, A.D.,  
652 McGuire, A.T., Kulp, D.W., Oliveira, T., Scharf, L., *et al.* (2015). Immunization for HIV-1  
653 Broadly Neutralizing Antibodies in Human Ig Knockin Mice. *Cell* *161*, 1505-1515.  
654 Emsley, P., and Cowtan, K. (2004). Coot: model-building tools for molecular graphics.  
655 *Acta Crystallogr D Biol Crystallogr* *60*, 2126-2132.  
656 Escolano, A., Dosenovic, P., and Nussenzweig, M.C. (2017). Progress toward active or  
657 passive HIV-1 vaccination. *The Journal of experimental medicine* *214*, 3-16.  
658 Escolano, A., Steichen, J.M., Dosenovic, P., Kulp, D.W., Golijanin, J., Sok, D., Freund, N.T.,  
659 Gitlin, A.D., Oliveira, T., Araki, T., *et al.* (2016). Sequential Immunization Elicits  
660 Broadly Neutralizing Anti-HIV-1 Antibodies in Ig Knockin Mice. *Cell* *166*, 1445-1458  
661 e1412.  
662 Falkowska, E., Le, K.M., Ramos, A., Doores, K.J., Lee, J.H., Blattner, C., Ramirez, A.,  
663 Derking, R., van Gils, M.J., Liang, C.H., *et al.* (2014). Broadly neutralizing HIV antibodies  
664 define a glycan-dependent epitope on the prefusion conformation of gp41 on cleaved  
665 envelope trimers. *Immunity* *40*, 657-668.  
666 Gao, F., Bailes, E., Robertson, D.L., Chen, Y., Rodenburg, C.M., Michael, S.F., Cummins,  
667 L.B., Arthur, L.O., Peeters, M., Shaw, G.M., *et al.* (1999). Origin of HIV-1 in the  
668 chimpanzee *Pan troglodytes troglodytes*. *Nature* *397*, 436-441.

669 Garces, F., Lee, J.H., de Val, N., de la Pena, A.T., Kong, L., Puchades, C., Hua, Y., Stanfield,  
670 R.L., Burton, D.R., Moore, J.P., *et al.* (2015). Affinity Maturation of a Potent Family of  
671 HIV Antibodies Is Primarily Focused on Accommodating or Avoiding Glycans.  
672 *Immunity* *43*, 1053-1063.

673 Garces, F., Sok, D., Kong, L., McBride, R., Kim, H.J., Saye-Francisco, K.F., Julien, J.P., Hua,  
674 Y., Cupo, A., Moore, J.P., *et al.* (2014). Structural evolution of glycan recognition by a  
675 family of potent HIV antibodies. *Cell* *159*, 69-79.

676 Georgiev, I.S., Doria-Rose, N.A., Zhou, T., Kwon, Y.D., Staube, R.P., Moquin, S., Chuang,  
677 G.Y., Louder, M.K., Schmidt, S.D., Altae-Tran, H.R., *et al.* (2013). Delineating antibody  
678 recognition in polyclonal sera from patterns of HIV-1 isolate neutralization. *Science*  
679 *340*, 751-756.

680 Gorman, J., Soto, C., Yang, M.M., Davenport, T.M., Guttman, M., Bailer, R.T., Chambers,  
681 M., Chuang, G.Y., DeKosky, B.J., Doria-Rose, N.A., *et al.* (2016). Structures of HIV-1 Env  
682 V1V2 with broadly neutralizing antibodies reveal commonalities that enable vaccine  
683 design. *Nat Struct Mol Biol* *23*, 81-90.

684 Harvey, D.J., Baruah, K., and Scanlan, C.N. (2009). Application of negative ion MS/MS  
685 to the identification of N-glycans released from carcinoembryonic antigen cell  
686 adhesion molecule 1 (CEACAM1). *J Mass Spectrom* *44*, 50-60.

687 Havenar-Daughton, C., Lee, J.H., and Crotty, S. (2017). Tfh cells and HIV bnAbs, an  
688 immunodominance model of the HIV neutralizing antibody generation problem.  
689 *Immunological reviews* *275*, 49-61.

690 Haynes, B.F., Kelsoe, G., Harrison, S.C., and Kepler, T.B. (2012). B-cell-lineage  
691 immunogen design in vaccine development with HIV-1 as a case study. *Nature*  
692 *biotechnology* *30*, 423-433.

693 Haynes, B.F., and Mascola, J.R. (2017). The quest for an antibody-based HIV vaccine.  
694 *Immunological reviews* *275*, 5-10.

695 Jardine, J., Julien, J.P., Menis, S., Ota, T., Kalyuzhniy, O., McGuire, A., Sok, D., Huang, P.S.,  
696 MacPherson, S., Jones, M., *et al.* (2013). Rational HIV immunogen design to target  
697 specific germline B cell receptors. *Science* *340*, 711-716.

698 Jardine, J.G., Ota, T., Sok, D., Pauthner, M., Kulp, D.W., Kalyuzhniy, O., Skog, P.D.,  
699 Thinnes, T.C., Bhullar, D., Briney, B., *et al.* (2015). HIV-1 VACCINES. Priming a broadly  
700 neutralizing antibody response to HIV-1 using a germline-targeting immunogen.  
701 *Science* *349*, 156-161.

702 Julien, J.P., Cupo, A., Sok, D., Stanfield, R.L., Lyumkis, D., Deller, M.C., Klasse, P.J., Burton,  
703 D.R., Sanders, R.W., Moore, J.P., *et al.* (2013a). Crystal structure of a soluble cleaved  
704 HIV-1 envelope trimer. *Science* *342*, 1477-1483.

705 Julien, J.P., Lee, J.H., Cupo, A., Murin, C.D., Derking, R., Hoffenberg, S., Caulfield, M.J.,  
706 King, C.R., Marozsan, A.J., Klasse, P.J., *et al.* (2013b). Asymmetric recognition of the  
707 HIV-1 trimer by broadly neutralizing antibody PG9. *Proceedings of the National*  
708 *Academy of Sciences of the United States of America* *110*, 4351-4356.

709 Kepler, T.B., Liao, H.X., Alam, S.M., Bhaskarabhatla, R., Zhang, R., Yandava, C., Stewart,  
710 S., Anasti, K., Kelsoe, G., Parks, R., *et al.* (2014). Immunoglobulin gene insertions and  
711 deletions in the affinity maturation of HIV-1 broadly reactive neutralizing antibodies.  
712 *Cell Host Microbe* *16*, 304-313.

713 Klein, F., Diskin, R., Scheid, J.F., Gaebler, C., Mouquet, H., Georgiev, I.S., Pancera, M.,  
714 Zhou, T., Incesu, R.B., Fu, B.Z., *et al.* (2013). Somatic mutations of the immunoglobulin



715 framework are generally required for broad and potent HIV-1 neutralization. *Cell*  
716 *153*, 126-138.

717 Korber, B., Muldoon, M., Theiler, J., Gao, F., Gupta, R., Lapedes, A., Hahn, B.H., Wolinsky,  
718 S., and Bhattacharya, T. (2000). Timing the ancestor of the HIV-1 pandemic strains.  
719 *Science* *288*, 1789-1796.

720 Kwon, Y.D., Pancera, M., Acharya, P., Georgiev, I.S., Crooks, E.T., Gorman, J., Joyce, M.G.,  
721 Guttman, M., Ma, X., Narpala, S., *et al.* (2015). Crystal structure, conformational  
722 fixation and entry-related interactions of mature ligand-free HIV-1 Env. *Nature*  
723 *structural & molecular biology* *22*, 522-531.

724 Landais, E., Huang, X., Havenar-Daughton, C., Murrell, B., Price, M.A., Wickramasinghe,  
725 L., Ramos, A., Bian, C.B., Simek, M., Allen, S., *et al.* (2016). Broadly Neutralizing  
726 Antibody Responses in a Large Longitudinal Sub-Saharan HIV Primary Infection  
727 Cohort. *PLoS pathogens* *12*, e1005369.

728 Landais, E., Murrell, B., Briney, B., Murrell, S., Rantalainen, K., Berndsen, Z.T., Ramos,  
729 A., Wickramasinghe, L., Smith, M.L., Eren, K., *et al.* (2017). HIV Envelope Glycoform  
730 Heterogeneity and Localized Diversity Govern the Initiation and Maturation of a V2  
731 Apex Broadly Neutralizing Antibody Lineage. *Immunity* *47*, 990-1003 e1009.

732 Lee, J.H., Andrabi, R., Su, C.Y., Yasmeen, A., Julien, J.P., Kong, L., Wu, N.C., McBride, R.,  
733 Sok, D., Pauthner, M., *et al.* (2017). A Broadly Neutralizing Antibody Targets the  
734 Dynamic HIV Envelope Trimer Apex via a Long, Rigidified, and Anionic beta-Hairpin  
735 Structure. *Immunity* *46*, 690-702.

736 Lee, J.H., de Val, N., Lyumkis, D., and Ward, A.B. (2015). Model Building and  
737 Refinement of a Natively Glycosylated HIV-1 Env Protein by High-Resolution  
738 Cryoelectron Microscopy. *Structure* *23*, 1943-1951.

739 Lee, J.H., Ozorowski, G., and Ward, A.B. (2016). Cryo-EM structure of a native, fully  
740 glycosylated, cleaved HIV-1 envelope trimer. *Science* *351*, 1043-1048.

741 Lyumkis, D., Julien, J.P., de Val, N., Cupo, A., Potter, C.S., Klasse, P.J., Burton, D.R.,  
742 Sanders, R.W., Moore, J.P., Carragher, B., *et al.* (2013). Cryo-EM structure of a fully  
743 glycosylated soluble cleaved HIV-1 envelope trimer. *Science* *342*, 1484-1490.

744 McCoy, L.E., and Burton, D.R. (2017). Identification and specificity of broadly  
745 neutralizing antibodies against HIV. *Immunological reviews* *275*, 11-20.

746 McGuire, A.T., Gray, M.D., Dosenovic, P., Gitlin, A.D., Freund, N.T., Petersen, J., Correnti,  
747 C., Johnsen, W., Kegel, R., Stuart, A.B., *et al.* (2016). Specifically modified Env  
748 immunogens activate B-cell precursors of broadly neutralizing HIV-1 antibodies in  
749 transgenic mice. *Nature communications* *7*, 10618.

750 McGuire, A.T., Hoot, S., Dreyer, A.M., Lippy, A., Stuart, A., Cohen, K.W., Jardine, J., Menis,  
751 S., Scheid, J.F., West, A.P., *et al.* (2013). Engineering HIV envelope protein to activate  
752 germline B cell receptors of broadly neutralizing anti-CD4 binding site antibodies.  
753 *The Journal of experimental medicine* *210*, 655-663.

754 McLellan, J.S., Pancera, M., Carrico, C., Gorman, J., Julien, J.P., Khayat, R., Louder, R.,  
755 Pejchal, R., Sastry, M., Dai, K., *et al.* (2011). Structure of HIV-1 gp120 V1/V2 domain  
756 with broadly neutralizing antibody PG9. *Nature* *480*, 336-343.

757 Montefiori, D.C. (2005). Evaluating neutralizing antibodies against HIV, SIV, and SHIV  
758 in luciferase reporter gene assays. *Current protocols in immunology* / edited by John  
759 E Coligan [et al] *Chapter 12*, Unit 12.11.

760 Moore, P.L., Gray, E.S., Sheward, D., Madiga, M., Ranchobe, N., Lai, Z., Honnen, W.J.,  
761 Nonyane, M., Tumba, N., Hermanus, T., *et al.* (2011). Potent and broad neutralization  
762 of HIV-1 subtype C by plasma antibodies targeting a quaternary epitope including  
763 residues in the V2 loop. *Journal of virology* *85*, 3128-3141.

764 Morgand, M., Bouvin-Pley, M., Plantier, J.C., Moreau, A., Alessandri, E., Simon, F., Pace,  
765 C.S., Pancera, M., Ho, D.D., Poignard, P., *et al.* (2016). V1/V2 Neutralizing Epitope is  
766 Conserved in Divergent Non-M Groups of HIV-1. *J Acquir Immune Defic Syndr* *71*, 237-  
767 245.

768 Ogura, T., Iwasaki, K., and Sato, C. (2003). Topology representing network enables  
769 highly accurate classification of protein images taken by cryo electron-microscope  
770 without masking. *J Struct Biol* *143*, 185-200.

771 Ozorowski, G., Pallesen, J., de Val, N., Lyumkis, D., Cottrell, C.A., Torres, J.L., Copps, J.,  
772 Stanfield, R.L., Cupo, A., Pugach, P., *et al.* (2017). Open and closed structures reveal  
773 allostery and pliability in the HIV-1 envelope spike. *Nature* *547*, 360-363.

774 Pancera, M., Shahzad-Ul-Hussan, S., Doria-Rose, N.A., McLellan, J.S., Bailer, R.T., Dai, K.,  
775 Loesgen, S., Louder, M.K., Staube, R.P., Yang, Y., *et al.* (2013). Structural basis for  
776 diverse N-glycan recognition by HIV-1-neutralizing V1-V2-directed antibody PG16.  
777 *Nature structural & molecular biology* *20*, 804-813.

778 Pancera, M., Zhou, T., Druz, A., Georgiev, I.S., Soto, C., Gorman, J., Huang, J., Acharya, P.,  
779 Chuang, G.Y., Ofek, G., *et al.* (2014). Structure and immune recognition of trimeric pre-  
780 fusion HIV-1 Env. *Nature* *514*, 455-461.

781 Panico, M., Bouche, L., Binet, D., O'Connor, M.J., Rahman, D., Pang, P.C., Canis, K., North,  
782 S.J., Desrosiers, R.C., Chertova, E., *et al.* (2016). Mapping the complete glycoproteome  
783 of virion-derived HIV-1 gp120 provides insights into broadly neutralizing antibody  
784 binding. *Sci Rep* *6*, 32956.

785 Pejchal, R., Doores, K.J., Walker, L.M., Khayat, R., Huang, P.S., Wang, S.K., Stanfield, R.L.,  
786 Julien, J.P., Ramos, A., Crispin, M., *et al.* (2011). A potent and broad neutralizing  
787 antibody recognizes and penetrates the HIV glycan shield. *Science* *334*, 1097-1103.

788 Pritchard, L.K., Harvey, D.J., Bonomelli, C., Crispin, M., and Doores, K.J. (2015). Cell-  
789 and Protein-Directed Glycosylation of Native Cleaved HIV-1 Envelope. *Journal of*  
790 *virology* *89*, 8932-8944.

791 Pugach, P., Ozorowski, G., Cupo, A., Ringe, R., Yasmineen, A., de Val, N., Derking, R., Kim,  
792 H.J., Korzun, J., Golabek, M., *et al.* (2015). A native-like SOSIP.664 trimer based on a  
793 HIV-1 subtype B env gene. *Journal of virology*.

794 Riedel, S. (2005). Edward Jenner and the history of smallpox and vaccination. *Proc*  
795 *(Bayl Univ Med Cent)* *18*, 21-25.

796 Sanders, R.W., Derking, R., Cupo, A., Julien, J.P., Yasmineen, A., de Val, N., Kim, H.J.,  
797 Blattner, C., de la Pena, A.T., Korzun, J., *et al.* (2013). A next-generation cleaved, soluble  
798 HIV-1 Env trimer, BG505 SOSIP.664 gp140, expresses multiple epitopes for broadly  
799 neutralizing but not non-neutralizing antibodies. *PLoS pathogens* *9*, e1003618.

800 Sanders, R.W., van Gils, M.J., Derking, R., Sok, D., Ketas, T.J., Burger, J.A., Ozorowski, G.,  
801 Cupo, A., Simonich, C., Goo, L., *et al.* (2015). HIV-1 VACCINES. HIV-1 neutralizing  
802 antibodies induced by native-like envelope trimers. *Science* *349*, aac4223.

803 Saunders, K.O., Verkoczy, L.K., Jiang, C., Zhang, J., Parks, R., Chen, H., Housman, M.,  
804 Bouton-Verville, H., Shen, X., Trama, A.M., *et al.* (2017). Vaccine Induction of

805 Heterologous Tier 2 HIV-1 Neutralizing Antibodies in Animal Models. *Cell reports* 21,  
806 3681-3690.

807 Scheres, S.H. (2012). RELION: implementation of a Bayesian approach to cryo-EM  
808 structure determination. *J Struct Biol* 180, 519-530.

809 Seaman, M.S., Janes, H., Hawkins, N., Grandpre, L.E., Devoy, C., Giri, A., Coffey, R.T.,  
810 Harris, L., Wood, B., Daniels, M.G., *et al.* (2010). Tiered categorization of a diverse  
811 panel of HIV-1 Env pseudoviruses for assessment of neutralizing antibodies. *Journal*  
812 *of virology* 84, 1439-1452.

813 Sharma, S.K., de Val, N., Bale, S., Guenaga, J., Tran, K., Feng, Y., Dubrovskaya, V., Ward,  
814 A.B., and Wyatt, R.T. (2015). Cleavage-independent HIV-1 Env trimers engineered as  
815 soluble native spike mimetics for vaccine design. *Cell reports* 11, 539-550.

816 Sharp, P.M., and Hahn, B.H. (2011). Origins of HIV and the AIDS pandemic. *Cold Spring*  
817 *Harbor perspectives in medicine* 1, a006841.

818 Sok, D., Briney, B., Jardine, J.G., Kulp, D.W., Menis, S., Pauthner, M., Wood, A., Lee, E.C.,  
819 Le, K.M., Jones, M., *et al.* (2016a). Priming HIV-1 broadly neutralizing antibody  
820 precursors in human Ig loci transgenic mice. *Science*.

821 Sok, D., Doores, K.J., Briney, B., Le, K.M., Saye-Francisco, K.L., Ramos, A., Kulp, D.W.,  
822 Julien, J.P., Menis, S., Wickramasinghe, L., *et al.* (2014a). Promiscuous glycan site  
823 recognition by antibodies to the high-mannose patch of gp120 broadens  
824 neutralization of HIV. *Science translational medicine* 6, 236ra263.

825 Sok, D., Pauthner, M., Briney, B., Lee, J.H., Saye-Francisco, K.L., Hsueh, J., Ramos, A., Le,  
826 K.M., Jones, M., Jardine, J.G., *et al.* (2016b). A Prominent Site of Antibody Vulnerability  
827 on HIV Envelope Incorporates a Motif Associated with CCR5 Binding and Its  
828 Camouflaging Glycans. *Immunity* 45, 31-45.

829 Sok, D., van Gils, M.J., Pauthner, M., Julien, J.P., Saye-Francisco, K.L., Hsueh, J., Briney,  
830 B., Lee, J.H., Le, K.M., Lee, P.S., *et al.* (2014b). Recombinant HIV envelope trimer selects  
831 for quaternary-dependent antibodies targeting the trimer apex. *Proceedings of the*  
832 *National Academy of Sciences of the United States of America* 111, 17624-17629.

833 Steichen, J.M., Kulp, D.W., Tokatlian, T., Escolano, A., Dosenovic, P., Stanfield, R.L.,  
834 McCoy, L.E., Ozorowski, G., Hu, X., Kalyuzhniy, O., *et al.* (2016a). HIV Vaccine Design to  
835 Target Germline Precursors of Glycan-Dependent Broadly Neutralizing Antibodies.  
836 *Immunity* 45, 483-496.

837 Steichen, J.M., Kulp, D.W., Tokatlian, T., Escolano, A., Dosenovic, P., Stanfield, R.L.,  
838 McCoy, L.E., Ozorowski, G., Hu, X., Kalyuzhniy, O., *et al.* (2016b). HIV Vaccine Design to  
839 Target Germline Precursors of Glycan-Dependent Broadly Neutralizing Antibodies.  
840 *Immunity* 45, 483-496.

841 Tas, J.M., Mesin, L., Pasqual, G., Targ, S., Jacobsen, J.T., Mano, Y.M., Chen, C.S., Weill, J.C.,  
842 Reynaud, C.A., Browne, E.P., *et al.* (2016). Visualizing antibody affinity maturation in  
843 germinal centers. *Science* 351, 1048-1054.

844 Tian, M., Cheng, C., Chen, X., Duan, H., Cheng, H.L., Dao, M., Sheng, Z., Kimble, M., Wang,  
845 L., Lin, S., *et al.* (2016). Induction of HIV Neutralizing Antibody Lineages in Mice with  
846 Diverse Precursor Repertoires. *Cell* 166, 1471-1484 e1418.

847 Tiller, T., Meffre, E., Yurasov, S., Tsuiji, M., Nussenzweig, M.C., and Wardemann, H.  
848 (2008). Efficient generation of monoclonal antibodies from single human B cells by  
849 single cell RT-PCR and expression vector cloning. *Journal of immunological methods*  
850 329, 112-124.

851 Verkoczy, L., Diaz, M., Holl, T.M., Ouyang, Y.B., Bouton-Verville, H., Alam, S.M., Liao,  
852 H.X., Kelsoe, G., and Haynes, B.F. (2010). Autoreactivity in an HIV-1 broadly reactive  
853 neutralizing antibody variable region heavy chain induces immunologic tolerance.  
854 *Proceedings of the National Academy of Sciences of the United States of America* *107*,  
855 181-186.

856 Voss, J.E., Andrabi, R., McCoy, L.E., de Val, N., Fuller, R.P., Messmer, T., Su, C.Y., Sok, D.,  
857 Khan, S.N., Garces, F., *et al.* (2017). Elicitation of Neutralizing Antibodies Targeting the  
858 V2 Apex of the HIV Envelope Trimer in a Wild-Type Animal Model. *Cell reports* *21*,  
859 222-235.

860 Voss, N.R., Yoshioka, C.K., Radermacher, M., Potter, C.S., and Carragher, B. (2009). DoG  
861 Picker and TiltPicker: software tools to facilitate particle selection in single particle  
862 electron microscopy. *J Struct Biol* *166*, 205-213.

863 Walker, L.M., Huber, M., Doores, K.J., Falkowska, E., Pejchal, R., Julien, J.P., Wang, S.K.,  
864 Ramos, A., Chan-Hui, P.Y., Moyle, M., *et al.* (2011). Broad neutralization coverage of  
865 HIV by multiple highly potent antibodies. *Nature* *477*, 466-470.

866 Walker, L.M., Phogat, S.K., Chan-Hui, P.Y., Wagner, D., Phung, P., Goss, J.L., Wrin, T.,  
867 Simek, M.D., Fling, S., Mitcham, J.L., *et al.* (2009). Broad and potent neutralizing  
868 antibodies from an African donor reveal a new HIV-1 vaccine target. *Science* *326*, 285-  
869 289.

870 Wang, S., Mata-Fink, J., Kriegsman, B., Hanson, M., Irvine, D.J., Eisen, H.N., Burton, D.R.,  
871 Wittrup, K.D., Kardar, M., and Chakraborty, A.K. (2015). Manipulating the Selection  
872 Forces during Affinity Maturation to Generate Cross-Reactive HIV Antibodies. *Cell*  
873 *160*, 785-797.

874 Ward, A.B., and Wilson, I.A. (2017). The HIV-1 envelope glycoprotein structure:  
875 nailing down a moving target. *Immunological reviews* *275*, 21-32.

876 Webb, B., and Sali, A. (2016). Comparative Protein Structure Modeling Using  
877 MODELLER. *Curr Protoc Bioinformatics* *54*, 5 6 1-5 6 37.

878 Wibmer, C.K., Bhiman, J.N., Gray, E.S., Tumba, N., Abdool Karim, S.S., Williamson, C.,  
879 Morris, L., and Moore, P.L. (2013). Viral escape from HIV-1 neutralizing antibodies  
880 drives increased plasma neutralization breadth through sequential recognition of  
881 multiple epitopes and immunotypes. *PLoS pathogens* *9*, e1003738.

882 Williams, W.B., Zhang, J., Jiang, C., Nicely, N.I., Fera, D., Luo, K., Moody, M.A., Liao, H.X.,  
883 Alam, S.M., Kepler, T.B., *et al.* (2017). Initiation of HIV neutralizing B cell lineages with  
884 sequential envelope immunizations. *Nature communications* *8*, 1732.

885 Worobey, M., Gemmel, M., Teuwen, D.E., Haselkorn, T., Kunstman, K., Bunce, M.,  
886 Muyembe, J.J., Kabongo, J.M., Kalengayi, R.M., Van Marck, E., *et al.* (2008). Direct  
887 evidence of extensive diversity of HIV-1 in Kinshasa by 1960. *Nature* *455*, 661-664.

888 Wu, X., Yang, Z.Y., Li, Y., HogerCorp, C.M., Schief, W.R., Seaman, M.S., Zhou, T., Schmidt,  
889 S.D., Wu, L., Xu, L., *et al.* (2010). Rational design of envelope identifies broadly  
890 neutralizing human monoclonal antibodies to HIV-1. *Science* *329*, 856-861.

891 Xiao, X., Chen, W., Feng, Y., Zhu, Z., Prabakaran, P., Wang, Y., Zhang, M.Y., Longo, N.S.,  
892 and Dimitrov, D.S. (2009). Germline-like predecessors of broadly neutralizing  
893 antibodies lack measurable binding to HIV-1 envelope glycoproteins: implications for  
894 evasion of immune responses and design of vaccine immunogens. *Biochemical and*  
895 *biophysical research communications* *390*, 404-409.

896 Zhang, K. (2016). Gctf: Real-time CTF determination and correction. *J Struct Biol* *193*,  
897 1-12.  
898 Zhang, M., Gaschen, B., Blay, W., Foley, B., Haigwood, N., Kuiken, C., and Korber, B.  
899 (2004). Tracking global patterns of N-linked glycosylation site variation in highly  
900 variable viral glycoproteins: HIV, SIV, and HCV envelopes and influenza  
901 hemagglutinin. *Glycobiology* *14*, 1229-1246.  
902 Zheng, S.Q., Palovcak, E., Armache, J.P., Verba, K.A., Cheng, Y., and Agard, D.A. (2017).  
903 MotionCor2: anisotropic correction of beam-induced motion for improved cryo-  
904 electron microscopy. *Nature methods* *14*, 331-332.  
905 Zhou, T., Georgiev, I., Wu, X., Yang, Z.Y., Dai, K., Finzi, A., Kwon, Y.D., Scheid, J.F., Shi, W.,  
906 Xu, L., *et al.* (2010). Structural basis for broad and potent neutralization of HIV-1 by  
907 antibody VRC01. *Science* *329*, 811-817.  
908  
909

910 **Figure legends**

911

912 **Figure 1. Design of a chimpanzee Env-stabilized trimer and binding to V2**  
913 **apex bnAb iGL Abs**

914

915 **A.** Structural arrangement of the V2 apex bnAb core epitope region on BG505.664  
916 soluble Env trimer (modified from (Garces et al., 2015) (PDB: 5CEZ)). The ribbon  
917 representation of V1V2 loop strands that form the trimer apex show a cluster of  
918 positively charged lysine-rich peptide regions (HXB2- R166-K171: R or K residues  
919 shown as blue spheres) and the two glycans N156 and N160 (depicted in green  
920 spheres with lines). The side chains of the positively charged residues intersperse  
921 with the side chains of residues from adjacent protomers to form a continuous  
922 positively charged surface at the tip of the trimer to provide a minimal V2 apex  
923 bnAb epitope.

924 **B.** Amino-acid sequence alignment of strand B and C V2 of HIV CRF250,  
925 CAP256.SU, chimpanzee SIV MT145 WT and its V2-modified variant (Q171K),  
926 MT145K. Glutamine (Q) at position 171 (shown in red) was substituted with lysine  
927 (K) in MT145 Env to gain binding to V2 apex bnAb inferred germline (iGL) Abs.

928 **C.** ELISA binding of mature V2 apex bnAbs, PG9, CAP256.09 and CH01 and their  
929 iGL versions to WT MT145 (red) and MT145K SOSIP trimers.

930 **D.** Octet binding curves (association: 120s (180–300) and dissociation: 240s (300–  
931 540)) of CAP256 UCA and CH01 iGL Abs and their respective mature Ab versions  
932 (CAP256.09 and CH01) to MT145K trimer, its glycan knock-out (N160K) variant,  
933 K-rich core epitope substituted variants and the corresponding monomeric gp120.  
934 The Abs were immobilized on human IgG Fc capture biosensors and 1uM trimer  
935 or gp120 proteins used as analytes. The binding response is shown as nanometer  
936 (nm).

937

938 **Figure 2. Cryo-EM structure of the MT145K trimer**

939

940 **A.** Schematic showing MT145K SOSIP soluble trimer design from its full-length  
941 gp160 Env sequence. The gp120 constant (C1-C5) and variable (V1-V5) regions  
942 and the gp41 regions (fusion peptide (FP), heptad repeat (HR1 and HR2),  
943 membrane proximal external region (MPER), transmembrane (TM) and  
944 cytoplasmic tail (CT)) are indicated. The N-linked glycan positions for each NXT/S  
945 residue are labeled according to the HIV HXB2 numbering scheme. The SOSIP  
946 trimer stabilizing modifications include: (i) disulfide bond: A501C-T605C, (ii) R6  
947 cleavage site, (iii) I559P, and (iv) 664-residue truncation in gp41 MPER. The  
948 substitution to incorporate a K-residue at position 171 (Q171K) to gain binding for  
949 V2 apex iGL Abs is indicated in blue.

950 **B-C.** Side and top views of the unliganded MT145K trimer model based on the  
951 cryo-EM density map at ~4.1 Å resolution. Ribbon representations of the MT145K  
952 trimer spike, in which the subunits gp120 (cornflower blue) and gp41 (orange) are  
953 depicted on one protomer. The gp120 variable loops (V1-V5) positioned to the  
954 trimer periphery are depicted in different colors (V1: khaki, V2: red, V3: magenta,  
955 V4: yellow and V5: chartreuse). The fusion peptide region of gp41 is shown in  
956 cyan. Glycan sugar residues modeled based on density are represented in forest  
957 green stick form.

958 **D.** Superimposition of variable loops (V1-V5) and fusion peptide region for MT145K  
959 and unliganded HIV clade A BG505 (PDB: 4ZMJ) SOSIP trimers. The dotted lines  
960 indicate regions in the V-loops or FP for which the observed electron density was  
961 absent or unclear.

962 **E.** Structural comparison of gp41 regions of MT145K (orange) and BG505 (grey)  
963 trimers. The gp41 structural elements overall show a similar arrangement except  
964 for the fusion peptide region (colored cyan on MT145K and pink on BG505), that  
965 is exposed on the BG505 trimer but remains hidden in a pocket inside the MT145K  
966 trimer.

967

968 **Figure 3. Site-specific glycoform composition of MT145K trimer**

969

970 A. Site-specific glycoform quantification of the MT145K SOSIP soluble trimer.  
971 MT145K trimers from transiently transfected HEK293T cell expressed  
972 supernatants were affinity purified by the quaternary trimer-specific antibody,  
973 PGT145. The purified MT145K trimers were treated separately with three  
974 proteases: trypsin, chymotrypsin and elastase and the digests were enriched for  
975 glycopeptides and analysed by LC-ESI MS. The individual glycan composition of  
976 the N-linked glycan sites (n=26) is represented by bar graphs that indicate the  
977 relative abundance of each glycoform species and are derived from the mean of  
978 two analytical replicates. The pie charts summarize the proportion of glycoforms  
979 for each site and this information is color coded; oligomannose-type (green) and  
980 complex/hybrid glycans (pink).

981 B. HILIC-UPLC profiles of the total N-linked glycans released from MT145K  
982 trimers. The proportions of oligomannose plus hybrid glycan contents and  
983 complex-type glycans are represented in green and pink colors, respectively.

984 C. Modeled glycan shields for MT145K and BG505 SOSIP trimers.  $\text{Man}_9\text{GlcNAc}_2$   
985 oligomannose-type glycans were docked and rigid-body-fitted at each of the  
986 corresponding Env glycan positions using the MT145K structure (determined in  
987 this study (PDB: submit)) and the unliganded BG505 SOSIP.664 trimer structure  
988 ((Kwon et al., 2015) PDB: 4ZMJ). Top and side views of the trimers are shown and  
989 the individual glycan sites are labelled and color-coded based on the content of  
990 oligomannose; green (100-80%), orange (79-20%) and pink (19-0%).

991

#### 992 **Figure 4. Antigenic profile of the MT145K trimer**

993

994 A. HIV-1 Env-specific mAbs were used to characterize the antigenicity of the  
995 MT145K Env trimer. MAbs targeting neutralizing and non-neutralizing epitope  
996 specificities, including V2-apex, N332-V3, linear V3, CD4bs, CD4i and gp120-41  
997 interface were tested with MT145K and BG505 Env-encoding pseudoviruses in a  
998 TZM-bl cell-based reporter assay. The reciprocal  $\text{IC}_{50}$  neutralization titers for each  
999 virus are indicated as dot plots; plots for individual epitope specificities are depicted  
1000 separately. The neutralization sensitivity comparison of BG505 and MT145K



1001 viruses against the mAb panel shows a selectively potent neutralization of MT145K  
1002 by V2 apex bnAbs but no other bnAbs, except a single gp120-gp41 interface bnAb,  
1003 35022. BG505 virus was neutralized by bnAbs targeting diverse Env sites.

1004 **B.** The above mAb panel was further tested with PGT145 Ab-purified MT145K  
1005 trimer and GNL-purified MT145K gp120 monomer by ELISA. The binding,  
1006 represented as EC<sub>50</sub> binding titers, shows selective binding of MT145K by V2 apex  
1007 bnAbs. Two of the gp120-gp41 interface bnAbs and a CD4i mAb also showed  
1008 significant binding to MT145K trimer. Four of the non-neutralizing mAbs specific to  
1009 a linear V3 epitope exhibited binding to MT145K gp120, but not to the trimer.

1010

1011 **Figure 5. A close-up view of regions on the MT145K trimer that correspond**  
1012 **to those recognized by HIV bnAbs on HIV trimers.**

1013

1014 **A.** V2 apex bnAb binding region: cryo-EM model of PGT145 bnAb (HC: transparent  
1015 sandy brown; LC: transparent orchid) in complex with BG505 SOSIP trimer  
1016 depicting V1V2 loops in ribbon representation ((Lee et al., 2017) PDB: 5V8L). The  
1017 strand C K-rich region (<sup>166</sup>RDKKQK<sup>171</sup>; red spheres) and the glycan N160 (forest  
1018 green sticks) that form the epitope for PGT145 bnAb are indicated. The elements  
1019 in the core epitope interact with the CDRL1 loop and the long CDRH3 loop that  
1020 penetrates through glycans to reach the positively charged surface underneath.  
1021 Both glycan N160 and the positively charged protein residues are conserved  
1022 between BG505 HIV-1 and MT145K SIV Env trimers.

1023 **B.** V3-glycan bnAb binding region: cryo-EM model of PGT128 bnAb (HC:  
1024 transparent sandy brown; LC: transparent orchid) in complex with the BG505  
1025 SOSIP trimer ((Lee et al., 2015) PDB: 5ACO). The V3 loop protein backbone  
1026 residues (<sup>324</sup>GDIR<sup>327</sup>; depicted in purple spheres) and the glycans N301 and N332  
1027 form the bnAb epitope and are shown to interact with the antibody CDR loops. The  
1028 MT145K trimer has a glycan at N334 rather than N332 and the glycan points away  
1029 from the expected location of the PGT128 Ab paratope. In addition, MT145K Env  
1030 has glycans at two positions N412, (positioned differently on HIV Env) and N442

1031 (absent on HIV Envs) and particularly the latter will clash with PGT128 CDRH2  
1032 and prevent it from interacting with the protein part of the epitope.

1033 **C.** The gp120-gp41 interface bnAb binding region: cryo-EM model of PGT151  
1034 bnAb bound to a membrane-extracted clade B JRFL Env trimer. The structure  
1035 depicts PGT151 bnAb CDRs interacting with gp120 and the gp41 interface regions  
1036 ((Lee et al., 2016); PDB: 5FUU). PGT151 CDRH3 interacts with the epitope formed  
1037 by the protein backbone (in both gp120 and gp41) including the fusion peptide  
1038 (depicted in pink) and the gp120 (N88, N448) and gp41 (N611 and N637) glycans  
1039 (not shown). PGT151 Ab CDR loops interact with the FP region on the BG505  
1040 trimer. The MT145K trimer FP region (cyan) remains hidden inside the trimer.

1041 **D.** Cryo-EM model of 2-domain human sCD4 with B41 SOSIP trimer ((Ozorowski  
1042 et al., 2017); PDB: 5VN3). The structure shows how the Phe43 residue on sCD4  
1043 stacks into the Env cavity lining Trp427. This Trp427 cavity is conserved between  
1044 HIV-1 and MT145K Envs to accommodate CD4 binding.

1045 **E-F.** CD4bs bnAb binding region: crystal structure of VRC01 bnAb in complex with  
1046 93TH057 gp120 ((Zhou et al., 2010) PDB: 3NGB). The structure depicts VRC01  
1047 CDRH3, CDRL3 and CDRL1 loops interacting with the protein residues in loop D  
1048 (HXB2: 278-282) and the glycan at N276. The MT145K trimer lacks the N276  
1049 glycan and bears glycan N236 (unique to SIV Env) in place of N234 that would  
1050 clash with the VRC01 CDRL1 loop. Additionally, the MT145K Env trimer has a  
1051 longer gp120-V5 loop due to a 6-amino acid insertion at HIV HXB2-456 residue  
1052 that would shift the loop such that it clashes with the CDRH2 the VRC01 Ab.

1053

1054 **Figure 6. Immunogenicity of MT145-WT compared to MT145K trimers in**  
1055 **CH01 UCA HC-only knock-in mice**

1056

1057 **A.** Schematic showing immunization schedule of CH01 UCA “HC-only” KI mice  
1058 with MT145-WT and engineered MT145K trimers. The CH01 UCA “HC-only” KI  
1059 mice were immunized twice with 25µg of the soluble trimer with GLA-SA as  
1060 adjuvant. Time points for immunization and bleeds are indicated.

1061 **B.** ELISA binding of the MT145-WT and MT145K group trimer-immunized CH01  
1062 UCA “HC-only” KI mice serum samples (pre-bleed (Pre), two-weeks post prime  
1063 (Bleed #1) and two-weeks post boost-1 (Bleed #2)) with soluble MT145K SOSIP  
1064 and its glycan knock-out variant (MT145K N160K) trimers.

1065 **C.** Neutralization titrations of the MT145-WT and MT145K group trimer immunized  
1066 CH01 UCA “HC-only” KI mice sera (pre-bleed (Pre), post prime (Bleed #1) and  
1067 post boost-1 (Bleed #2)) with MT145K virus and a CH01-sensitive virus (Q23\_17).  
1068 3-fold diluted sera were tested against the viruses in a TZM-bl reporter cell assay.

1069 **D.** ID<sub>50</sub> neutralization titers of the MT145-WT and MT145K group trimer-immunized  
1070 CH01 UCA “HC-only” KI mice sera (pre- and post-immunization bleed time points).  
1071 Neutralization was assessed against the priming immunogen-matched autologous  
1072 viruses in each group (MT145-WT group: MT145-WT virus, and MT145K group:  
1073 MT145K virus), the N160 glycan knock-out variant of MT145K virus (MT145K  
1074 N160A) and a highly CH01-sensitive virus, Q23\_17. The numerical values shown  
1075 in the table represent the ID<sub>50</sub> neutralization titers of the immune serum samples  
1076 and were calculated by non-linear regression method from the percent  
1077 neutralizations of serum titrations with virus.

1078

1079 **Figure 7. Immunizations combining chimpanzee SIV MT145K trimer with HIV**  
1080 **trimers in CH01 UCA HC-only knock-in mice**

1081

1082 **A.** Schematic showing immunization schedule of CH01 UCA “HC-only” KI mice  
1083 with combinations of chimpanzee SIV MT145K trimer and HIV Env derived trimers.  
1084 Four groups of 5 animals each were immunized with two doses (prime: week-0  
1085 and boost-1: week-4) of the trimers as follows; Group-1 (MT145K twice), Group-2  
1086 (MT145K followed by CRF250), Group-3 (CRF250 twice) and Group-4 (CRF250  
1087 followed by MT145K). Each group was further boosted (boost-2 at week-8) with an  
1088 HIV Env derived 3-trimer cocktail (C108, WITO and ZM197-ZM233V1V2). The  
1089 V1V2 loops on trimer cartoons are depicted in red to highlight that the region is  
1090 shared between HIV and SIV Env trimers. The CH01 UCA “HC-only” KI mice were  
1091 immunized with 25µg of the soluble trimer (MT145K or CRF250 or HIV trimer

1092 cocktail (25µg total)) with GLA-SE as adjuvant. Time points for the immunizations  
1093 and the bleeds are indicated.

1094 **B.** Comparison of CH01 UCA “HC-only” KI mice B cell priming by chimpanzee SIV  
1095 MT145 trimer and HIV Env derived CRF250 trimer. ID50 neutralization titers of the  
1096 pre-bleed (Pre) and post-prime (Bleed #1) sera from CH01 UCA “HC-only” KI mice  
1097 immunized in groups 1 and 2 with MT145K trimer and groups 3 and 4 with CRF250  
1098 trimer against MT145K, CFR250 and a highly CH01 sensitive virus Q23\_17 are  
1099 shown. Each dot in the plot represents virus ID50 values for individual animals  
1100 “\*” indicates that 50% neutralization was not reached at a 1:100 serum dilution.

1101 **C.** Dot plot showing comparison of ID50 neutralization titers of post boost-2 (Bleed  
1102 #3) sera from the four different groups of trimer immunized CH01 UCA “HC-only”  
1103 KI mice against the immunization prime and boost-matched and CH01 sensitive  
1104 pseudoviruses. Each dot represents an individual ID50 neutralization titer grouped  
1105 by virus (shown on the x-axis) and the mean ID50 values for each immunization  
1106 group against each virus (indicated by colored horizontal lines).

1107 **D.** The induction of neutralization breadth in CH01 UCA “HC-only” KI mice by the  
1108 full immunization schedule in Fig 7A. The reproducibility of neutralization breadth  
1109 is plotted as number of animals in each immunization group (groups indicated by  
1110 color) that reach  $1/ID_{50} > 100$  against each virus. The Bleed #3 serum ID50  
1111 neutralization responses for the groups that received chimpanzee SIV MT145K  
1112 alone or in combination with HIV CRF250 trimer show a trend for better  
1113 reproducibility in eliciting neutralization breadth than the group that had HIV Env  
1114 immunizations. The differences only achieve statistical significance ( $p=0.045$ )  
1115 when comparing reproducibility of neutralization breadth between groups 3 and 4  
1116 using nonparametric Mann-Whitney test.

1117

## 1118 **METHOD DETAILS**

1119

### 1120 **SIV envelope trimer design, its expression and purification**

1121 SOSIP.664 HIV-1 Env trimer modification were incorporated into envelope  
1122 encoding sequences corresponding to four Chimpanzee (SIVcpz*Ptt*) isolates  
1123 (GAB1 [GenBank: P17281]; MB897 [GenBank: ABU53023]; EK505 [GenBank:  
1124 ABD19499]; and MT145 [GenBank: ABD19508]) to express as soluble native  
1125 trimers as described previously (Sanders et al., 2013). Briefly, the following  
1126 modifications were incorporated into these Envs for soluble trimer expression: a)  
1127 the Env leader sequence was replaced by Tissue Plasminogen Activator (TPA)  
1128 signal sequence for higher protein expression; b) a disulfide bond was introduced  
1129 between gp120 and gp41 subunits by substituting residues A501-C and T605-C  
1130 respectively in gp120 and gp41; c) the gp120 REKR cleavage site was replaced  
1131 by Furin inducible R6 site (RRRRRR) for enhancing cleavage efficiency between  
1132 gp120 and gp41; and d) an I559P substitution in gp41 to stabilize the soluble trimer  
1133 protein. In addition, a GS-linker and a His-tag were added to the gp41<sub>ECTO</sub> C-  
1134 terminus at HXB2 residue 664 position. The codon-optimized SOSIP.664 gp140  
1135 gene constructs were synthesized (Genart, Life Technologies) and cloned into  
1136 the phCMV3 vector (Genlantis). Recombinant envelope proteins were expressed  
1137 in HEK293F cells as described elsewhere (Sanders et al., 2013). Briefly, HIV-1  
1138 Env trimers CRF250, WITO, C108, ZM197-ZM233V1V2 and the 4 chimpanzee  
1139 SIV SOSIP.664 Env-encoding trimer plasmids were cotransfected with a plasmid  
1140 encoding for Furin (3:1 ratio) into HEK293F cells using PEI-MAX 4000 transfection  
1141 reagent (*Polysciences, Inc.*). The secreted soluble trimers proteins were purified  
1142 from cell supernatants after 5 days using agarose-bound Gallanthus Nivalis Lectin  
1143 (GNL) (Vector Labs) or CNBr-activated Sepharose 4B bead (GE Healthcare)  
1144 bound PGT145 bnAb antibody affinity columns as described previously (Pugach  
1145 et al., 2015). The affinity-purified proteins were size exclusion chromatography  
1146 (SEC)-purified with a Superdex 200 10/300 GL column (GE Healthcare) in  
1147 PBS/TBS. The purified trimers for the immunization experiments were quality

1148 control tested for antigenicity with a range of HIV-1 Env-specific neutralizing and  
1149 non-neutralizing mAbs.

1150

### 1151 **Antibodies, expression and purification**

1152 HIV-1 envelope specific mAbs to a broad range of epitopes were used, including  
1153 those that target V2-apex, V3-N332, linear V3, CD4bs, CD4i and gp120-41 Env  
1154 sites. A dengue antibody (DEN3) was used as control Ab for binding experiments.  
1155 For PG9 and CH01 V2-apex bnAb inferred germline antibody designs, the heavy  
1156 and the light chain V-gene of the mature Abs were reverted to their corresponding  
1157 closest inferred germline gene sequence as determined using the  
1158 ImMunoGeneTics (IMGT) website (<http://imgt.cines.fr/>) (Brochet et al., 2008). The  
1159 reverted variable heavy and light chain nucleotide sequences were synthesized by  
1160 Genart (Life Technologies) and cloned into corresponding Igy1, Igk, and Igλ  
1161 expression vectors as previously described (Tiller et al., 2008), using the Gibson  
1162 cloning method (NEB, USA). The antibodies were expressed and purified using  
1163 methods described previously (Sok et al., 2014b). Briefly, the heavy and light chain  
1164 encoding plasmids were reconstituted (1:1 ratio) in Opti-MEM (Life Technologies),  
1165 and cotransfected HEK293F cells (Invitrogen) using 293fectin (Invitrogen). The  
1166 suspension cells were cultured for 4-5 days in a shaker incubator at 8% CO<sub>2</sub>,  
1167 37.0°C, and 125 rpm. The antibody containing supernatants were harvested,  
1168 filtered through a 0.22 mm Steriflip units (EMD Millipore) and passed over a protein  
1169 A or protein G affinity column (GE Healthcare). The bound antibody was eluted  
1170 from the columns in 0.1 M citric acid, pH 3.0. Column fractions containing IgG were  
1171 neutralized (2M Tris-base), pooled, and dialyzed against phosphate-buffered  
1172 saline (PBS), pH 7.4. IgG purity was determined by sodium dodecyl sulfate-  
1173 polyacrylamide gel electrophoresis, and the concentration was determined by  
1174 measuring the relative absorbance at 280 nm.

1175

### 1176 **Site-directed mutagenesis**

1177 The amino-acid point mutations in Env-encoding plasmids were incorporated by  
1178 using a QuikChange site-directed mutagenesis kit (Agilent Technologies, USA),

1179 according to the manufacturer's instructions. All of the mutations were confirmed  
1180 by DNA sequence analysis (Eton Bioscience, San Diego, CA).

1181

### 1182 **Differential Scanning Calorimetry**

1183 Thermal denaturation was analyzed with a differential scanning calorimetry (DSC)  
1184 using a MicroCal VP-Capillary DSC instrument (Malvern), at a scanning rate of 1  
1185 K/min under 3.0 atmospheres of pressure. Samples were dialyzed in PBS pH 7.4  
1186 overnight and protein concentration was adjusted to 0.5 mg/mL prior to  
1187 measurement. DSC data were analyzed after buffer correction, normalization, and  
1188 baseline subtraction using MicroCal VP-Capillary DSC analysis software provided  
1189 by the manufacturer.

1190

### 1191 **Negative stain electron microscopy and data treatment**

1192 Purified M145K sample was deposited on thin-carbon-coated (Edwards Auto 306  
1193 carbon evaporator) a C-flat EM grid (Cu400 mesh, 2 $\mu$ m hole diameter, 2 $\mu$ m hole  
1194 spacing) (Protochips, Morrisville, NC, USA) and embedded in 2% (w/V) uranyl  
1195 formate. The carbon-coated grids were Ar/O<sub>2</sub>-plasma-cleaned (Gatan Solarus  
1196 Model 950 Advanced Plasma System; Gatan Inc., Pleasanton, CA, USA) prior to  
1197 sample deposition. The uranyl-stained EM sample was then inserted into an FEI  
1198 Tecnai 12 microscope (Thermo Fisher Scientific, Waltham, MA, USA) equipped  
1199 with a US4000 CMOS detector (Gatan Inc., Pleasanton, CA, USA). The data was  
1200 collected at 52,000X nominal magnification resulting in a pixel size of 2.05Å at the  
1201 object level. Data was binned by a factor of 2 prior to data treatment. Projection  
1202 image identification in the micrographs was performed with a difference-of-  
1203 Gaussians implementation (Voss et al., 2009). Projection images subsequently  
1204 underwent 2D alignment and classification by iterative multi-reference  
1205 alignment/multivariate statistical analysis (Ogura et al., 2003).

1206

### 1207 **CryoEM sample preparation, data collection, processing and analysis**

1208 Purified MT145K sample was deposited on a C-flat EM grid (Cu400 mesh, 2 $\mu$ m  
1209 hole diameter, 2 $\mu$ m hole spacing) (Protochips, Morrisville, NC, USA) that had been

1210 Ar/O<sub>2</sub>-plasma-cleaned (Gatan Solarus Model 950 Advanced Plasma System;  
1211 Gatan Inc., Pleasanton, CA, USA) prior to sample deposition. Excess buffer was  
1212 then blotted away from the grid followed by plunging into and vitrification in liquid  
1213 ethane cooled by liquid nitrogen using a vitrobot (Thermo Fisher Scientific,  
1214 Waltham, MA, USA). The resulting cryo-EM specimen was transferred into an FEI  
1215 Titan Krios microscope (Thermo Fisher Scientific, Waltham, MA, USA) equipped  
1216 with a Gatan K2 Summit direct electron detector (Gatan Inc., Pleasanton, CA,  
1217 USA). Dose-fractionated data was collected in electron counting mode at a  
1218 nominal magnification of 29,000X resulting in a pixel size of 1.02 Å at the object  
1219 level. Micrograph movie frame exposure time was 200ms and each movie  
1220 micrograph was recorded over 10s (50 movie frames) corresponding to a total  
1221 dose of 94e<sup>-</sup>/Å<sup>2</sup>. Movie micrograph frames were subsequently aligned  
1222 (MotionCor2; (Zheng et al., 2017)), dose-weighted and signal-integrated resulting  
1223 in 1,281 micrographs for further data processing. CTF models were determined  
1224 using GCTF (Zhang, 2016). Candidate projection images of MT145K were  
1225 identified using a difference-of-Gaussians implementation (Voss et al., 2009). The  
1226 resulting set of candidate projection images subsequently underwent 2D alignment  
1227 and classification by use of Relion 2.1b1 (Scheres, 2012). ~95,000 projection  
1228 images corresponding to well-formed class averages of MT145K were selected for  
1229 further data processing. This data class was iteratively angularly refined and  
1230 reconstructed using a B41 unliganded Env trimer map rendered at 60 Å resolution  
1231 as an initial reference (Ozorowski et al., 2017). The data class then underwent 3D  
1232 classification into six classes with the initial reconstruction rendered at 60 Å  
1233 resolution as reference. From 3D classification, a subset of 44,301 projection  
1234 images was selected for final data processing comprising CTF model adjustment  
1235 at the projection-image level (Zhang, 2016) and angular refinement and  
1236 reconstruction (Scheres, 2012).

1237

### 1238 **Model building and refinement**

1239 A homology model (Modeller; (Webb and Sali, 2016)) was generated from  
1240 sequence alignment of MT145K and BG505 and the structure of the latter (PDB:



1241 4TVP). Significant manual rebuilding followed in Coot (Emsley and Cowtan, 2004).  
1242 A fragment library was then created from the MT145K sequence containing 200  
1243 homologous, non-redundant sequences at each MT145K 7-mer position. Library  
1244 fragment-based, density-guided, real-space rebuilding was then performed  
1245 (DiMaio et al., 2015) with 319 decoys. The resulting models were evaluated  
1246 geometrically (MolProbity; (Chen et al., 2010)) and by fit-to-map (EMRinger;  
1247 (Barad et al., 2015)). The overall best model was selected for further iterations of  
1248 manual rebuilding and multi-decoy, density-guided, real-space, all-atom Rosetta  
1249 FastRelax refinement. Finally, glycans were manually built in Coot and restricted,  
1250 density-guided real-space refinement performed in Phenix 1.12 (Adams et al.,  
1251 2002) followed by model evaluation by MolProbity, EMRinger and Privateer (Agirre  
1252 et al., 2015).

1253

#### 1254 **Global N-linked glycan analysis**

1255 The quantifications and structural characterization of the total glycan pool was  
1256 achieved by cleaving the N-linked glycans from the surface of the glycoprotein  
1257 using an in-gel digestion with peptide N-glycosidase F (PNGaseF). The resultant  
1258 glycans were separated into two aliquots. The first was derivatized with 2-  
1259 aminobenzoic acid (2-AA) and subjected to HILIC-UPLC analysis using an Acquity  
1260 UPLC (Waters). To quantify the oligomannose content of the released glycans, the  
1261 labelled samples were treated with endoglycosidase H (endoH), which selectively  
1262 cleaves oligomannose glycans. Data analysis and interpretation were performed  
1263 using Empower software(Waters). The second aliquot of released glycans was  
1264 subjected to negative ion electrospray ion mobility mass spectrometry using a  
1265 Synapt G2Si mass spectrometer (Waters). Glycan compositions were determined  
1266 using collision induced dissociation (CID) fragmentation. Data analysis was  
1267 performed using Waters Driftscope (version 2.8) software and MassLynxTM  
1268 (version 4.1). Spectra were interpreted as described previously (Harvey et al.,  
1269 2009). The glycan compositions were used to generate a sample-specific glycan  
1270 library that was used to search the glycopeptide data to minimize the number of  
1271 false-positive assignments in site-specific analysis.

1272

### 1273 **LC-MS glycopeptide analysis**

1274 Site-specific N-glycosylation analysis was performed using proteolytic digestion  
1275 followed by tandem LC-MS. Prior to digestion, trimers were denatured, reduced  
1276 and alkylated by incubation for 1h at room temperature (RT) in a 50 mM Tris/HCl,  
1277 pH 8.0 buffer containing 6 M urea and 5 mM dithiothreitol (DTT), followed by the  
1278 addition of 20 mM iodacetamide (IAA) for a further 1h at RT in the dark, and then  
1279 additional DTT (20 mM) for another 1h, to eliminate any residual IAA. The alkylated  
1280 trimers were buffer-exchanged into 50 mM Tris/HCl, pH 8.0 using Vivaspin  
1281 columns (GE healthcare) and digested separately with trypsin, elastase and  
1282 chymotrypsin (Mass Spectrometry Grade, Promega) at a ratio of 1:30 (w/w).  
1283 Glycopeptides were selected from the protease-digested samples using the  
1284 ProteoExtract Glycopeptide Enrichment Kit (Merck Millipore) following the  
1285 manufacturer's protocol. Enriched glycopeptides were analyzed by LC-ESI MS on  
1286 an Orbitrap fusion mass spectrometer (Thermo Fisher Scientific), as previously  
1287 described (Behrens et al., 2016), using higher energy collisional dissociation  
1288 (HCD) fragmentation. Data analysis and glycopeptide identification were  
1289 performed using Byonic™ (Version 2.7) and Byologic™ software (Version 2.3;  
1290 Protein Metrics Inc.), as previously described (Behrens et al., 2016).

1291

### 1292 **Glycan modeling**

1293 Man<sub>9</sub>GlcNAc<sub>2</sub> oligomannose-type glycans were docked and rigid-body fitted at  
1294 each of the corresponding Env glycan positions using the MT145K structure  
1295 presented here or an unliganded BG505 SOSIP.664 structure (PDB: 4ZMJ).

1296

### 1297 **Pseudovirus production**

1298 To produce pseudoviruses, Env-encoding plasmids were cotransfected with an  
1299 Env-deficient backbone plasmid (pSG3ΔEnv) (1:2 ratio) using X-tremeGENE™ 9  
1300 (Sigma-Aldrich) DNA transfection reagent. Briefly, 1X10<sup>6</sup> cells in 10ml of  
1301 Dulbecco's Modified Eagle Medium (DMEM) were seeded in a 100mm x 20mm  
1302 cell culture dish (Corning) one day prior to transfection. For transfection, 40µl of X-

1303 tremeGENE™ 9 was added to 700µl of Opti-MEM I reduced serum medium  
1304 (Thermo Fisher) in tube 1. The Env-encoding plasmid (5 µg) and pSG3ΔEnv (10  
1305 µg) were added to tube 2 in 700µl of Opti-MEM. The tube 1 and tube 2 solutions  
1306 were mixed together and incubated for 25 min at room temperature. Next, the  
1307 transfection mixture was added to the media with 293T cells seeded previously  
1308 and then distributed uniformly. All pseudoviruses were harvested 48-72 h  
1309 posttransfection, filtered through 0.22 mm Steriflip units (EMD Millipore) and  
1310 aliquoted for use in neutralization assays.

1311

### 1312 **Neutralization assay**

1313 Neutralization was measured by using single-round replication-defective HIV Env-  
1314 pseudoviruses and TZM-bl target cells (Montefiori, 2005; Seaman et al., 2010).  
1315 25ul of 3-fold serially diluted mAbs or serum samples were pre-incubated at 37°C  
1316 for 1h with 25ul of tissue culture infective dose-50 (TCID<sub>50</sub>) Env-pseudotyped virus  
1317 in a half-area 96-well tissue culture plate. TZM-bl target cells (5,000 cells/well) in  
1318 50µl of DMEM were added and the plates were allowed to grow in humidified  
1319 incubator at 37°C and 5% CO<sub>2</sub>. The luciferase activity of the lysed cells was read  
1320 on instrument (Biotek) after 2-3 days, by adding lysis buffer followed by Brightglow  
1321 (Promega). The 50% inhibitory concentration (IC<sub>50</sub>) or 50% inhibitory doses (ID<sub>50</sub>)  
1322 was reported as the antibody concentration or serum dilution required to reduce  
1323 infection by half.

1324

### 1325 **ELISA binding assay**

1326 ELISA binding experiments were performed as described previously with minor  
1327 modification (Sanders et al., 2013). ELISA binding with SOSIP.664 trimer proteins  
1328 with mAbs was carried out by either capturing the trimer proteins onto the anti-His  
1329 capture antibodies or on the streptavidin coated plates through biotinylated trimers.  
1330 For trimer biotinylation, the SOSIP.664 proteins were randomly biotinylated using  
1331 a 2:1 molar ratio of biotin reagent to trimer using the EZ-link-NHS-PEG4-Biotin kit  
1332 (Thermo Fisher Scientific, 21324). MaxiSorp plates (Thermo Fisher Scientific)  
1333 were coated overnight at 4C with 2 ug/mL of anti-His Ab (Thermo Fisher Scientific)

1334 or 2 ug/mL streptavidin (Thermo Fisher Scientific). Plates were blocked for 1 hr  
1335 with 3% BSA and washed three times with 0.05% Tween 20-PBS (PBS-T) (pH  
1336 7.4). Anti-His or Streptavidin-coated plates were incubated with biotinylated trimers  
1337 in 1%BSA plus PBST for 1.5 hr and washed three times with PBST. 3-fold serially  
1338 diluted mAbs or sera were added starting at a maximum concentration of 10 ug/mL  
1339 (100ug/ml for iGL Abs) (sera at 1:100 dilution) in 1% BSA plus PBST, and  
1340 incubated at room temperature (RT) for 1.5 hr. Plates were washed three times  
1341 with PBST. Alkaline-phosphatase-conjugated goat anti-human IgG Fc secondary  
1342 antibody (Jackson ImmunoResearch Laboratories) was diluted 1:1000 in 1% BSA  
1343 PBST and added to plates for 1 hr at RT. Plates were washed three times with  
1344 PBST and incubated with phosphatase substrate (Sigma) for 15 mins and the  
1345 absorbance at 405 nm recorded. The 50% binding (EC50) was recorded as the  
1346 half of the maximum binding activity and was calculated by linear regression  
1347 method using Prism 6 Software.

1348

#### 1349 **Bio Layer Interferometry (BLI) binding assay**

1350 The binding experiments of Abs to the affinity purified trimers were performed with  
1351 an Octet K2 system (ForteBio, Pall Life Sciences). Briefly, the mAbs or IgGs (10  
1352 ug/mL in PBST) were immobilizing onto hydrated anti-human IgG-Fc biosensors  
1353 (AHC: ForteBio) for 60 seconds to achieve a binding response of at least 1.0. After  
1354 Ab capture, the sensor was placed in a PBST wash buffer to remove the unbound  
1355 Ab to establish a baseline signal. Next, the IgG immobilized sensor was dipped  
1356 into a solution containing SOSIP.664 trimer protein as analyte and incubated for  
1357 120 seconds at 1000 rpm. Following this, the trimer bound to IgG immobilized  
1358 sensor was removed from the analyte solution and placed into the PBST buffer for  
1359 240 seconds at 1000 rpm. The 2 and 4 minute binding intervals respectively denote  
1360 the association and dissociation binding curves reported in this study. The  
1361 sensograms were corrected with the blank reference and fit (1:1 binding kinetics  
1362 model) with the ForteBio Data Analysis version.9 software using the global fitting  
1363 function. The data are represented as maximum binding response or the  
1364 association and dissociation curve fits.

1365

1366 **Trimer protein immunizations in CH01 UCA HC-only KI-mice**

1367 For the immunization experiments, groups of 5 CH01 UCA HC-only knock-in B cell  
1368 expressing mice were immunized with 25ug of the individual trimer protein or 25ug  
1369 total protein of the 3-trimer cocktail (Prime, week-0; Boost-1, week-4 and Boost-2,  
1370 week-8) along with Glucopyranosyl Lipid Adjuvant in stable emulsion (GLA-SE) as  
1371 adjuvant. Immunizations were administered intramuscular in the leg of each animal  
1372 with 25µg of total trimer immunogens. Blood samples were collected at pre-bleed,  
1373 2-weeks each, post-prime (Bleed #1), post boost-1 (Bleed #2) and post boost-2  
1374 (Bleed #3) immunization time-point for the isolation of sera that were tested for  
1375 presence of neutralizing antibodies in TZM-bl cell based assay. Serum samples  
1376 were heat inactivated for potential complement activity at 56°C for 0.5 h. Mice used  
1377 in this study were approved by Duke University Institutional Animal Care and Use  
1378 Committee-approved animal protocols.

1379

1380 **Data availability**

1381 Cryo-EM reconstructions have been deposited in the Electron Microscopy Data  
1382 Bank under the accession numbers XXX.

1383

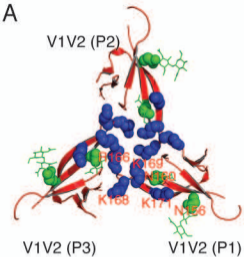

**B**

|           | 156   | 160                             | 166                     | 171   |
|-----------|-------|---------------------------------|-------------------------|-------|
| HXB2      | NCSFN | I N I S T S I                   | R G K V Q K E Y A F F Y |       |
| CRF250    | ...   | V T . E L . D . K K .           | ...                     | S ... |
| CAP256.SU | ...   | A T . E L . D . K K .           | ...                     | L ..  |
| MT145-WT  | ...   | V T . E L . D . K R Q V . S L . | ...                     |       |
| MT145K    | ...   | V T . E L . D . K R . V . S L . | ...                     |       |

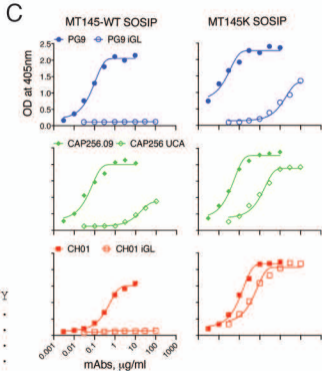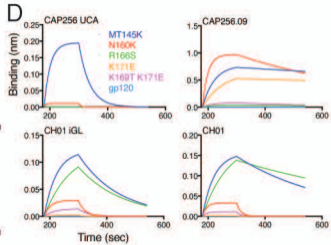

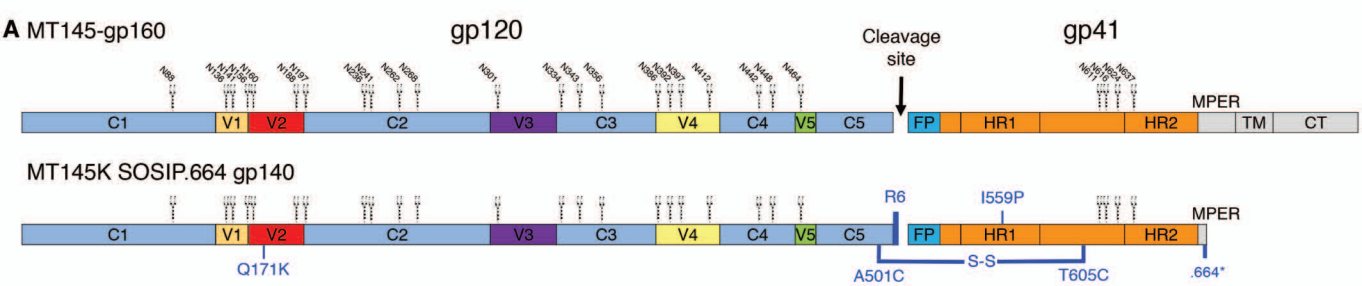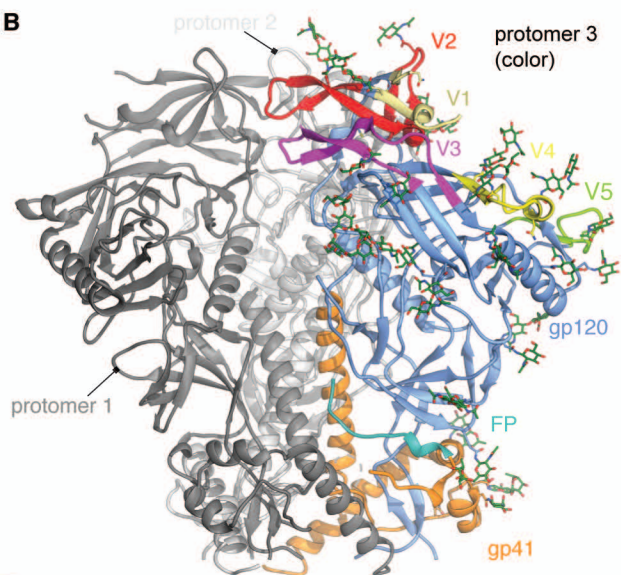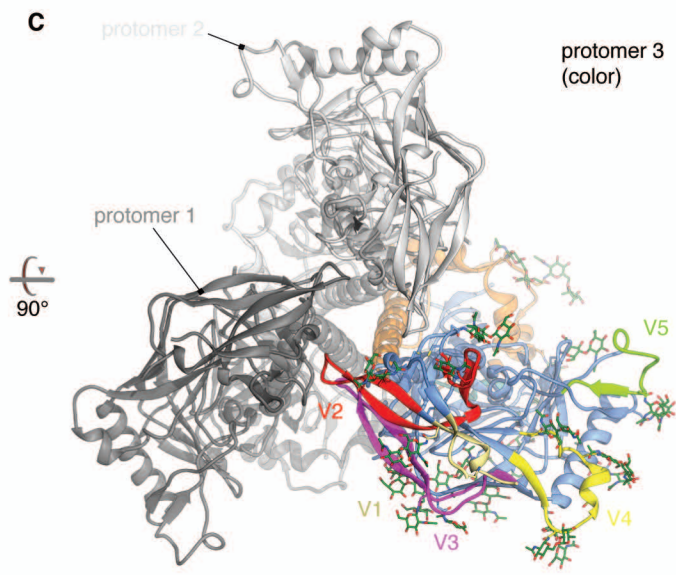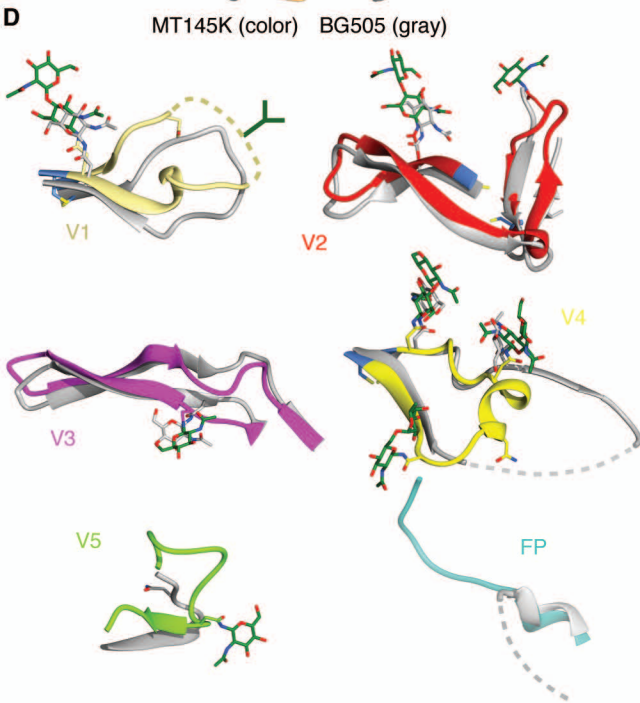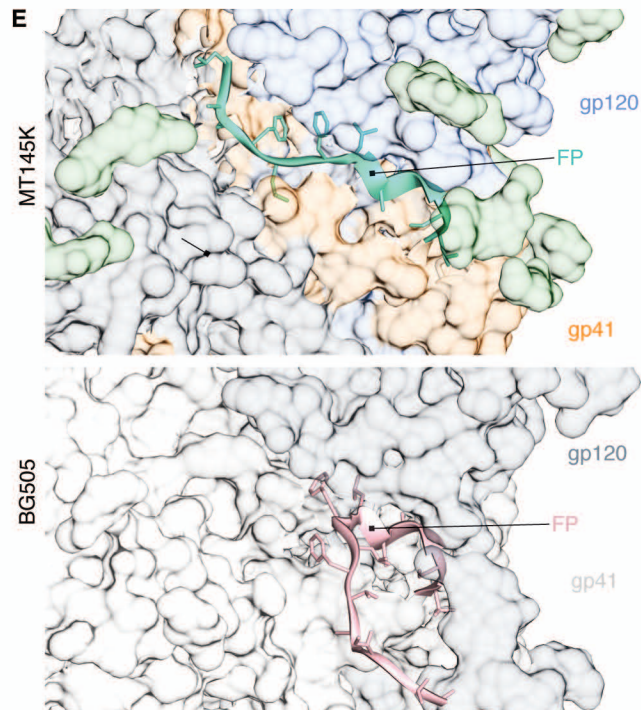

A

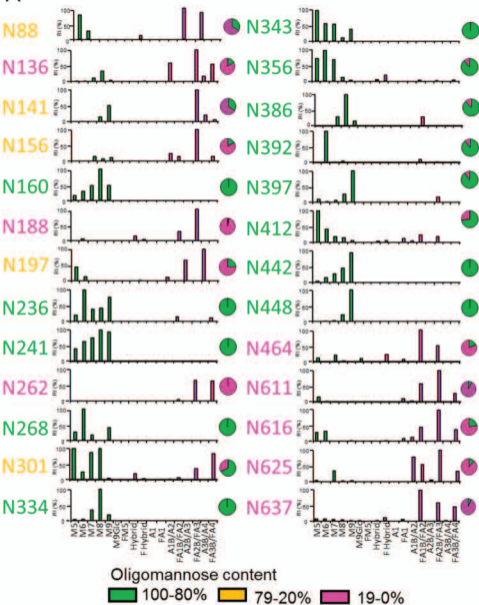

B

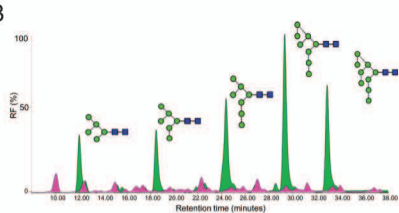

C

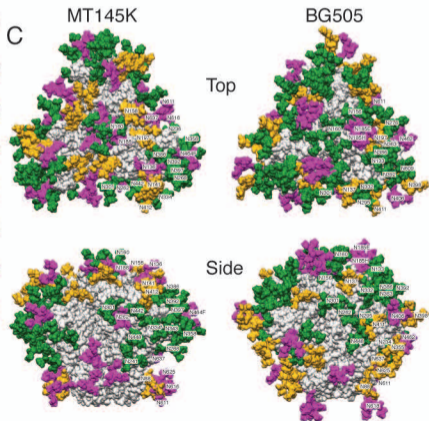



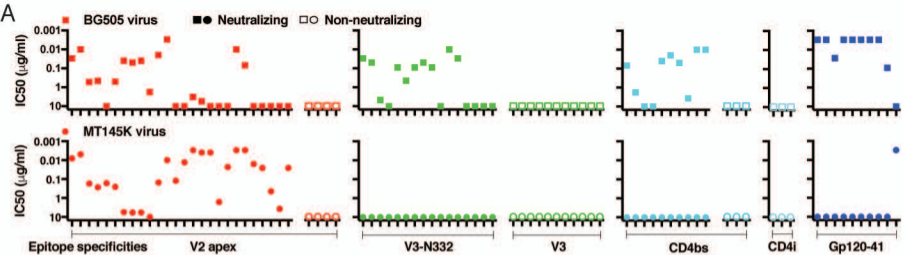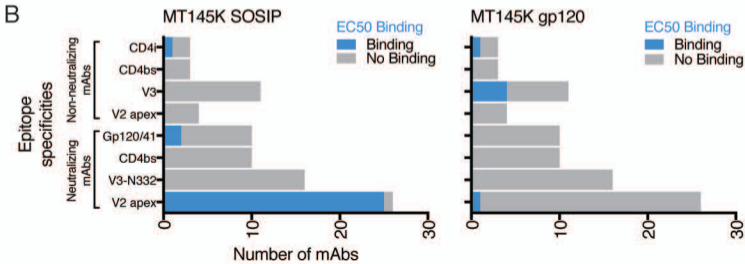

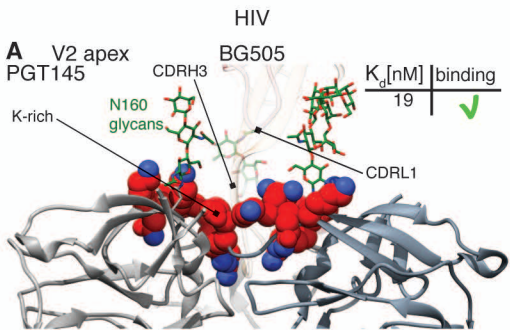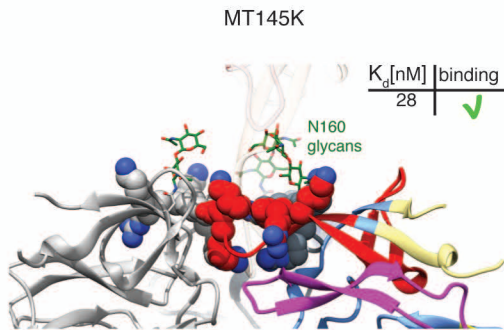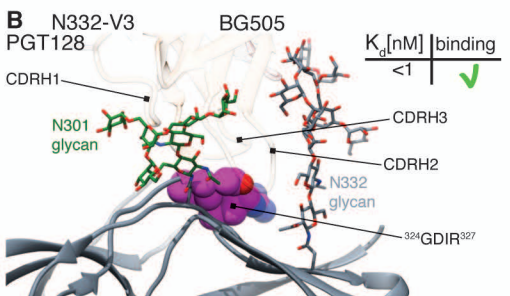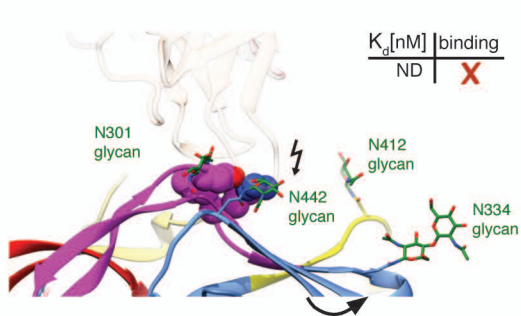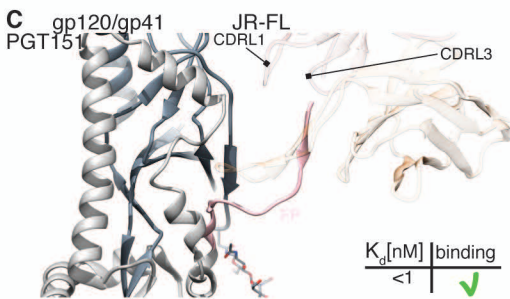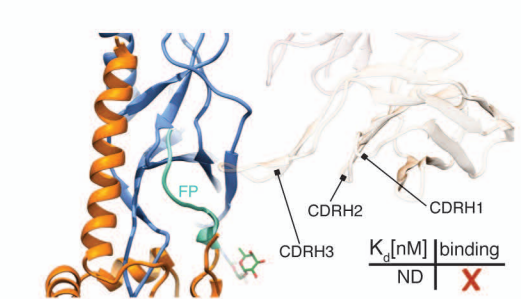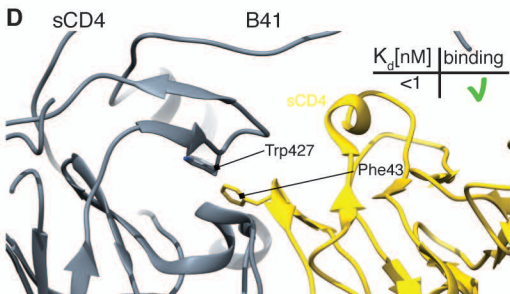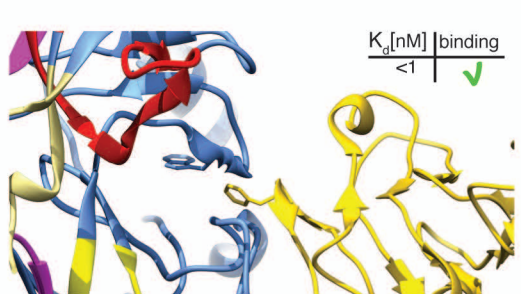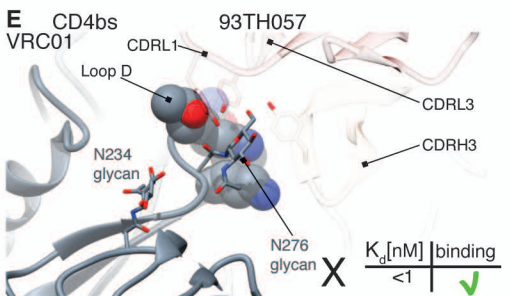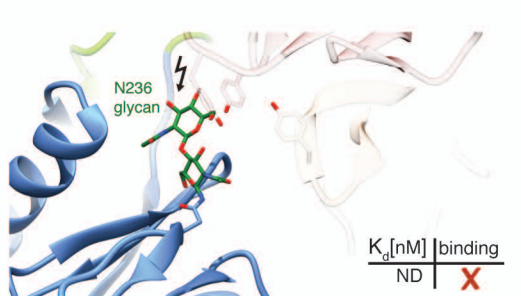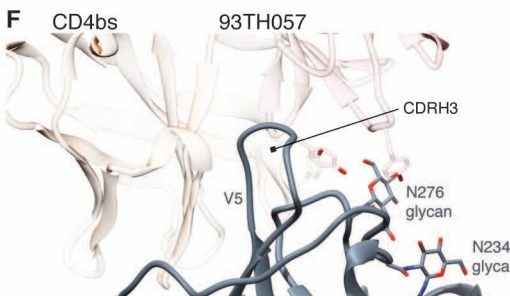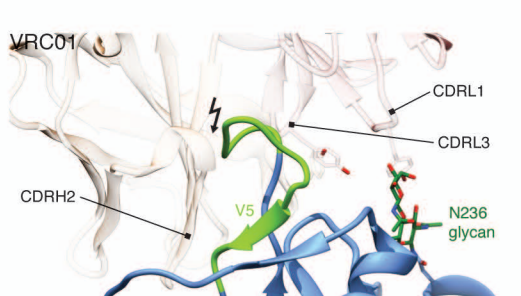

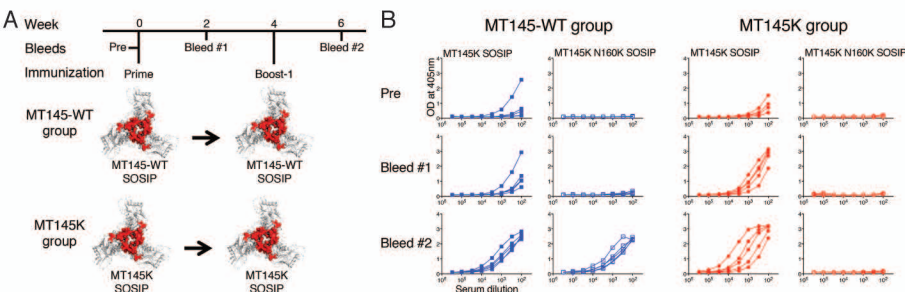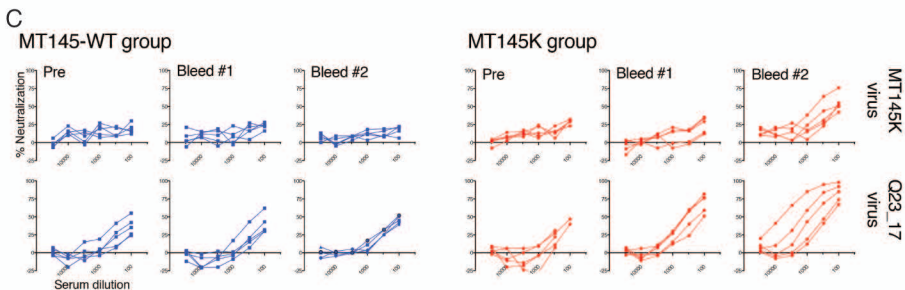

**D**

| Virus/mutant | MT145-WT group |       |       |       |       |          |       |       |       |       |          |       |       |       |       |
|--------------|----------------|-------|-------|-------|-------|----------|-------|-------|-------|-------|----------|-------|-------|-------|-------|
|              | Pre-bleed      |       |       |       |       | Bleed #1 |       |       |       |       | Bleed #2 |       |       |       |       |
|              | 13315          | 13316 | 13317 | 13318 | 13319 | 13315    | 13316 | 13317 | 13318 | 13319 | 13315    | 13316 | 13317 | 13318 | 13319 |
| MT145K       | <100           | <100  | <100  | <100  | <100  | <100     | <100  | <100  | <100  | <100  | <100     | <100  | <100  | <100  | <100  |
| MT145K N160A | <100           | <100  | <100  | <100  | <100  | <100     | <100  | <100  | <100  | <100  | <100     | <100  | <100  | <100  | <100  |
| MT145-WT     | <100           | <100  | <100  | <100  | <100  | <100     | <100  | <100  | <100  | <100  | <100     | <100  | <100  | <100  | <100  |
| Q23_17       | <100           | 150   | <100  | <100  | <100  | <100     | <100  | <100  | <100  | 160   | <100     | <100  | <100  | <100  | <100  |

  

| Virus/mutant | MT145K group |       |       |       |       |          |       |       |       |       |          |       |       |       |       |
|--------------|--------------|-------|-------|-------|-------|----------|-------|-------|-------|-------|----------|-------|-------|-------|-------|
|              | Pre-bleed    |       |       |       |       | Bleed #1 |       |       |       |       | Bleed #2 |       |       |       |       |
|              | 13200        | 13201 | 13202 | 13300 | 13301 | 13200    | 13201 | 13202 | 13300 | 13301 | 13200    | 13201 | 13202 | 13300 | 13301 |
| MT145K       | <100         | <100  | <100  | <100  | <100  | <100     | <100  | <100  | <100  | <100  | 109      | 121   | <100  | 135   | 576   |
| MT145K N160A | <100         | <100  | <100  | <100  | <100  | <100     | <100  | <100  | <100  | <100  | <100     | <100  | <100  | <100  | <100  |
| MT145-WT     | <100         | <100  | <100  | <100  | <100  | <100     | <100  | <100  | <100  | <100  | <100     | <100  | <100  | <100  | <100  |
| Q23_17       | <100         | <100  | <100  | <100  | <100  | 116      | 383   | 165   | 369   | 427   | 197      | 635   | 260   | 1397  | 6536  |

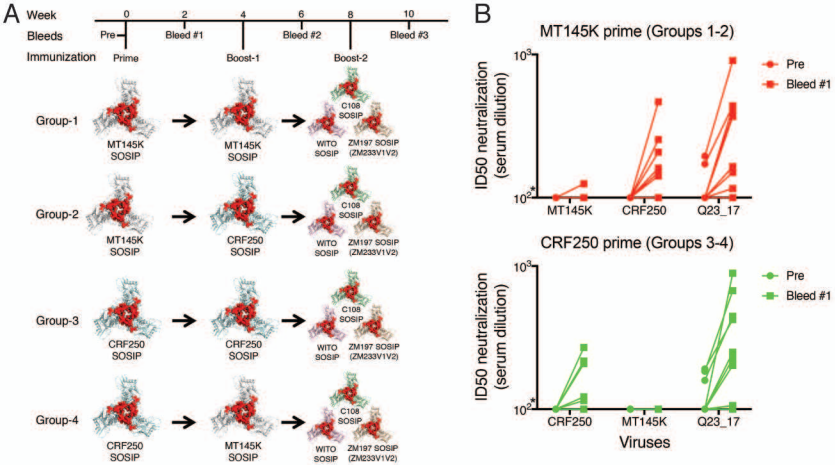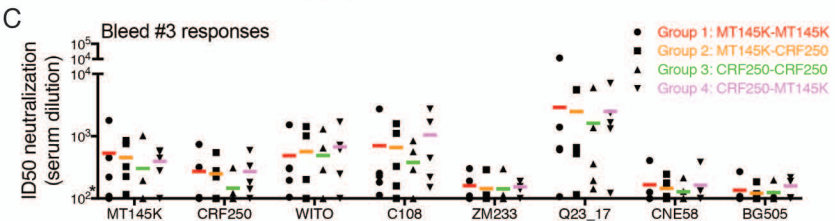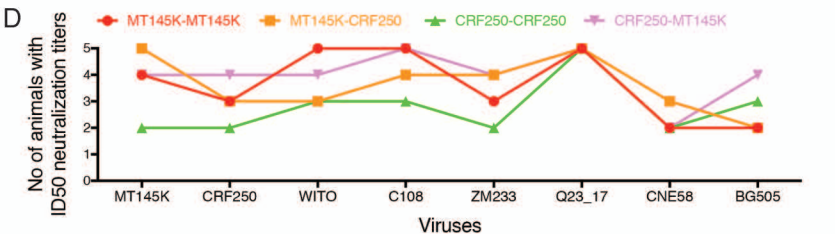

Source: http://biorxiv.org/content/10.1101/459164v1.full.pdf
